# Supplementary material for: Rational structural modification of the isatin scaffold to develop new and potent antimicrobial agents targeting bacterial peptidoglycan glycosyltransferase
Source: Royal Society of Chemistry journal article supplement (doi:10.1039/d1ra02119b), 2021-01-01
Supplement: d1ra02119b1.pdf [file d1ra02119b1.pdf]

## Supporting Information

### **Rational structural modification of isatin scaffold to develop new and potent antimicrobial agents targeting bacterial peptidoglycan glycosyltransferase**

Yong Wang<sup>‡</sup>, Zhi-Guang Liang<sup>‡</sup>, Yuanyuan Zheng, Alan Siu-Lun Leung, Siu-Cheong Yan, Pui-Kin So, Yun-Chung Leung, Wing-Leung Wong and Kwok-Yin Wong\*

State Key Laboratory of Chemical Biology and Drug Discovery, Department of Applied Biology and Chemical Technology, The Hong Kong Polytechnic University, Hunghom, Kowloon, Hong Kong, P. R. China.

<sup>‡</sup> The authors contributed equally to this work.

\* Corresponding author

E-mail: kwok-yin.wong@polyu.edu.hk

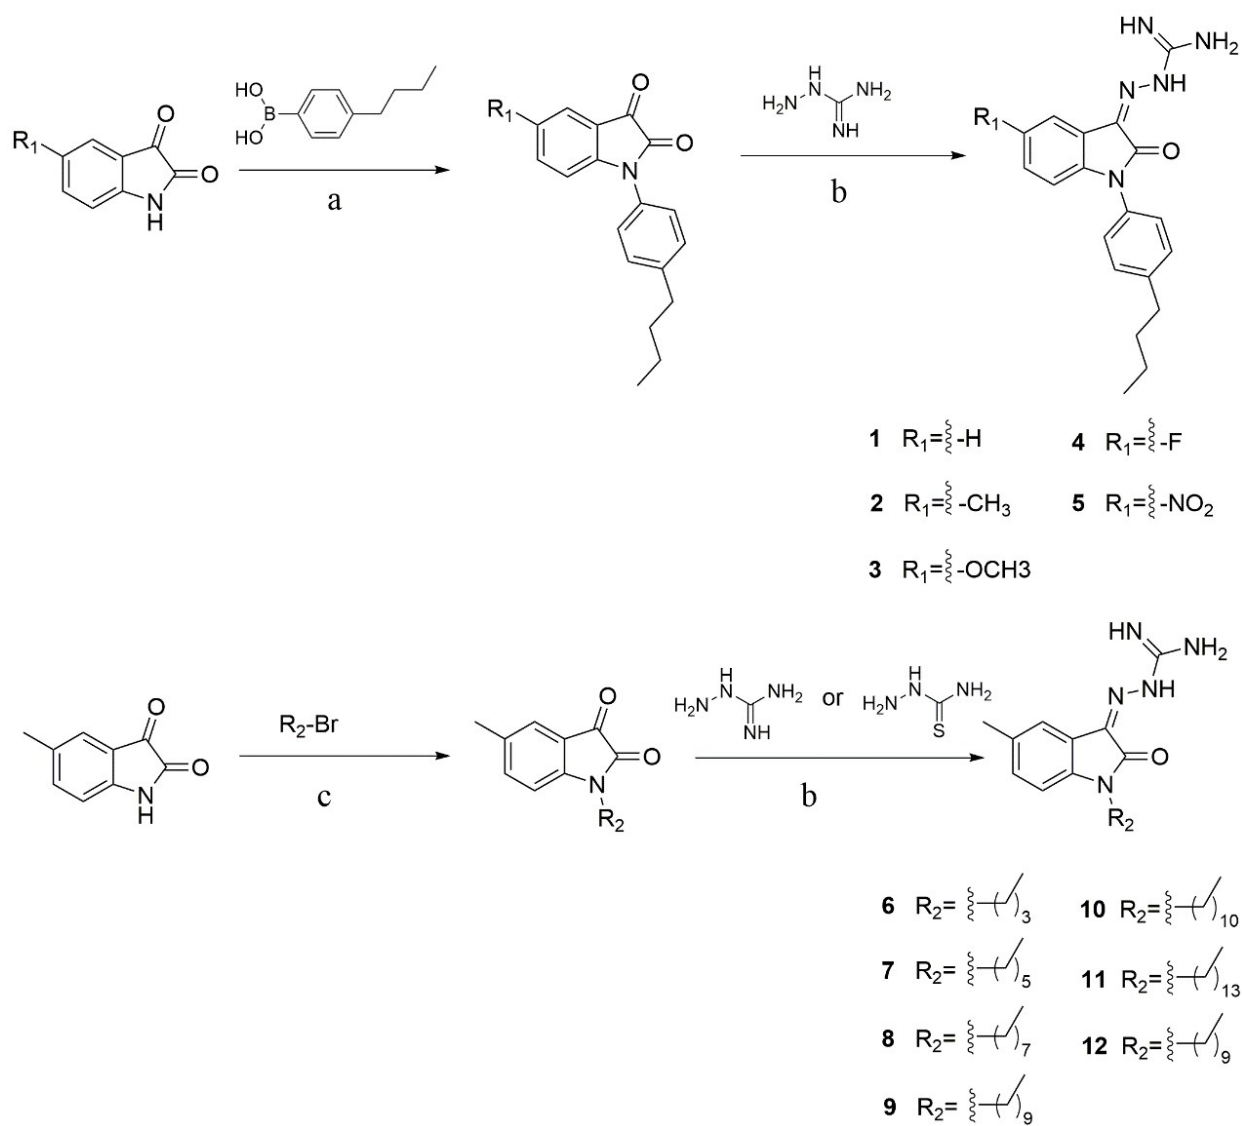

**Figure S1.** Synthetic routes for the new isatin-derivatives. Reaction conditions: (a)  $\text{Cu}(\text{OAc})_2$ ,  $\text{Et}_3\text{N}$ ,  $\text{CH}_2\text{Cl}_2$ , 24–48h; (b) acetic acid reflux, 2 h; (c)  $\text{DMF}$ ,  $\text{K}_2\text{CO}_3$ ,  $80^\circ\text{C}$ , 8 h

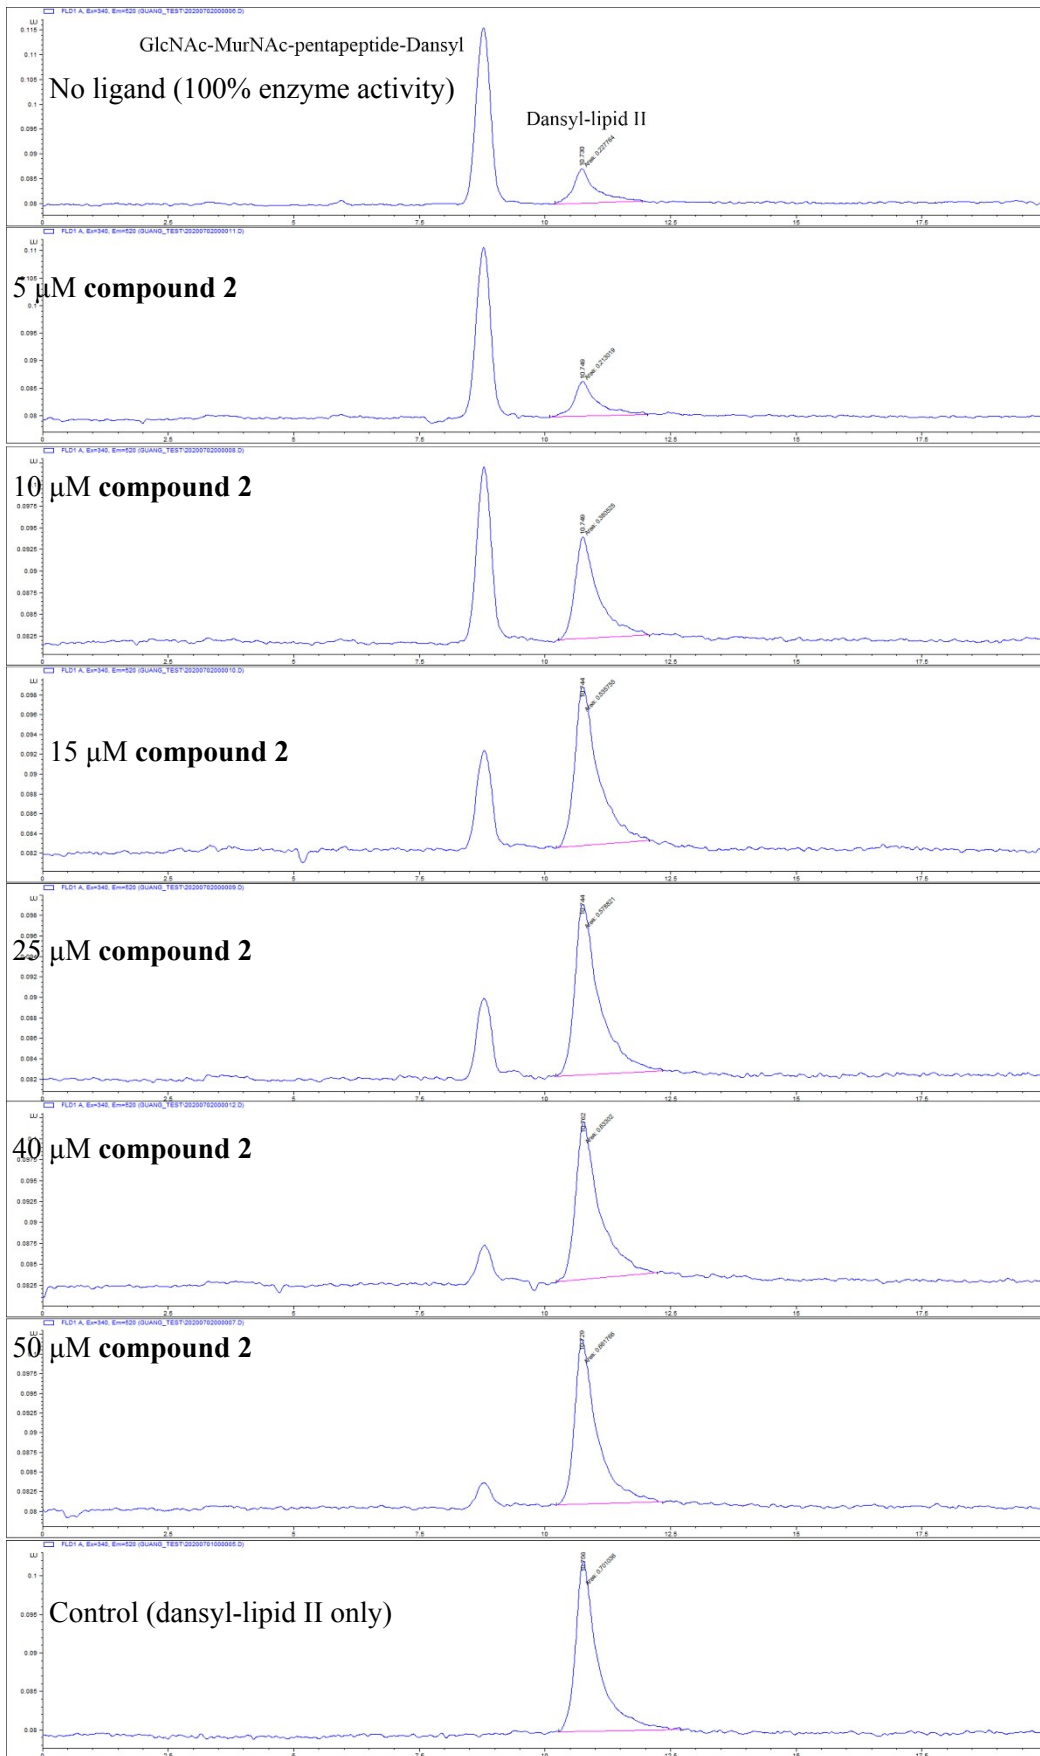

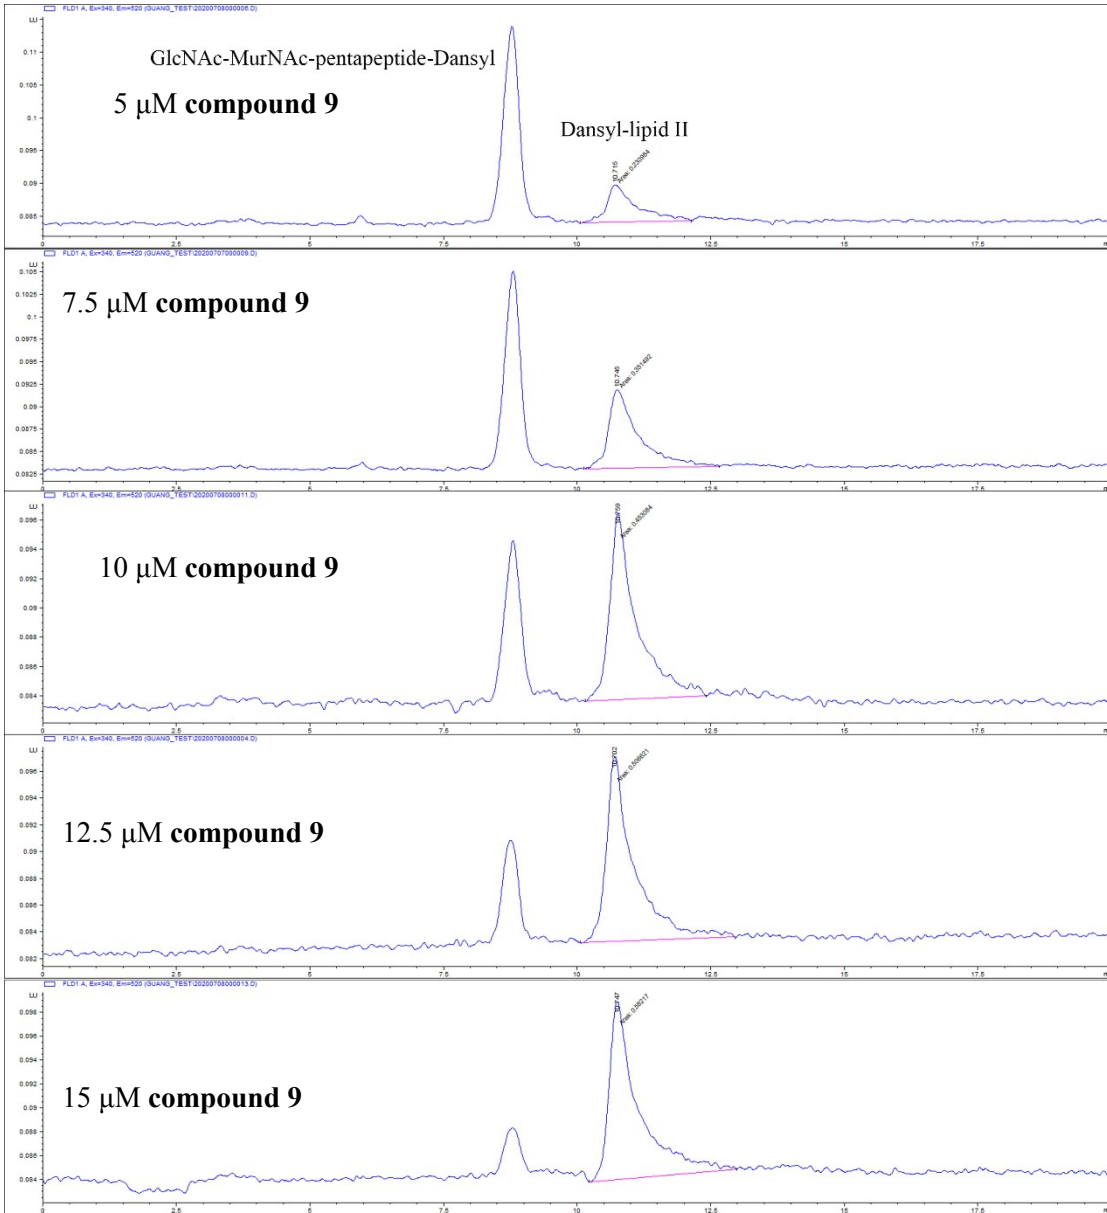



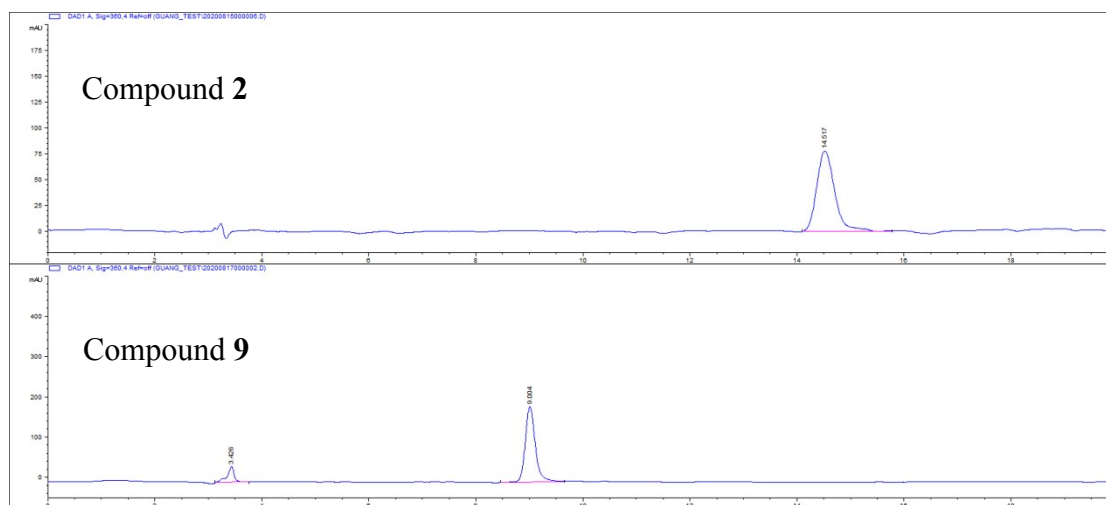

**Figure S3.** Purity studies of compound **2** and **9** by HPLC. Samples were injected into an Agilent 1200 series HPLC machine equipped with a Waters XBridge C<sub>18</sub> column (5  $\mu$ m, 4.6  $\times$  250 mm) and monitored at  $\lambda = 360$  nm; mobile phase: 20% water in methanol for compound **2**, retention time = 14.5 min; 10% water in methanol for compound **9**, retention time = 9 min.

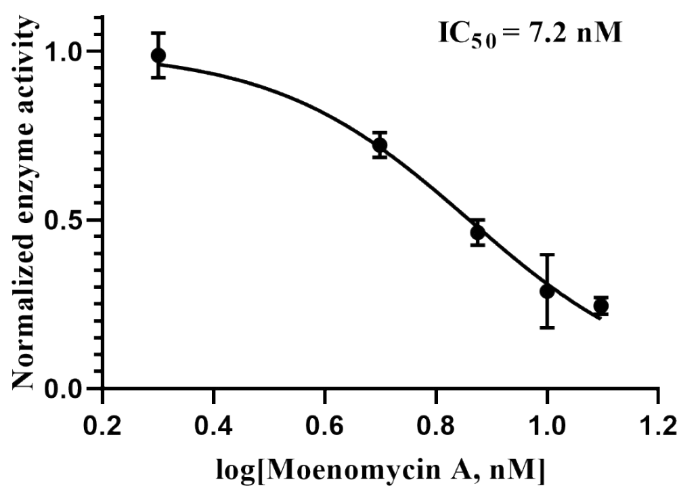

**Figure S4.** Half maximal inhibitory concentration of moenomycin A against *E. coli* PBP 1b.

(A)

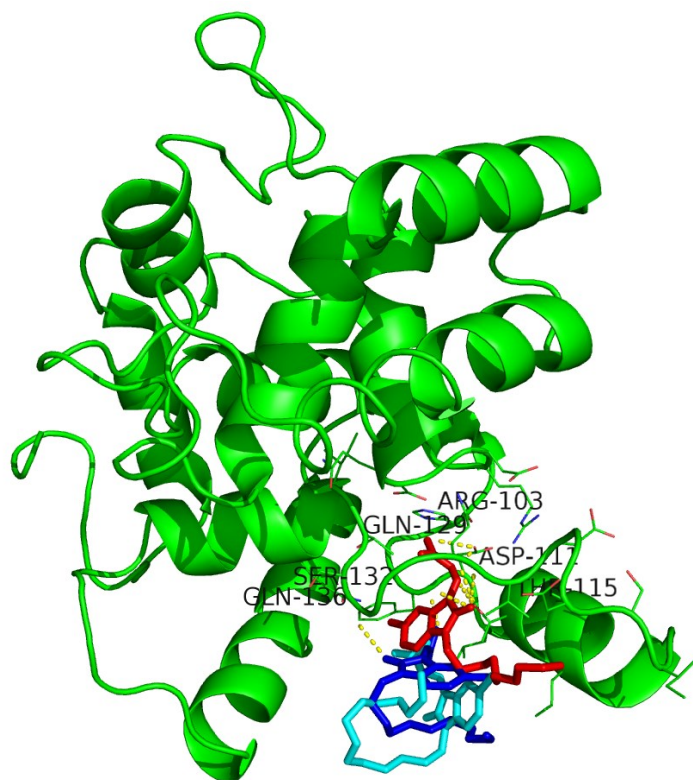

(B)

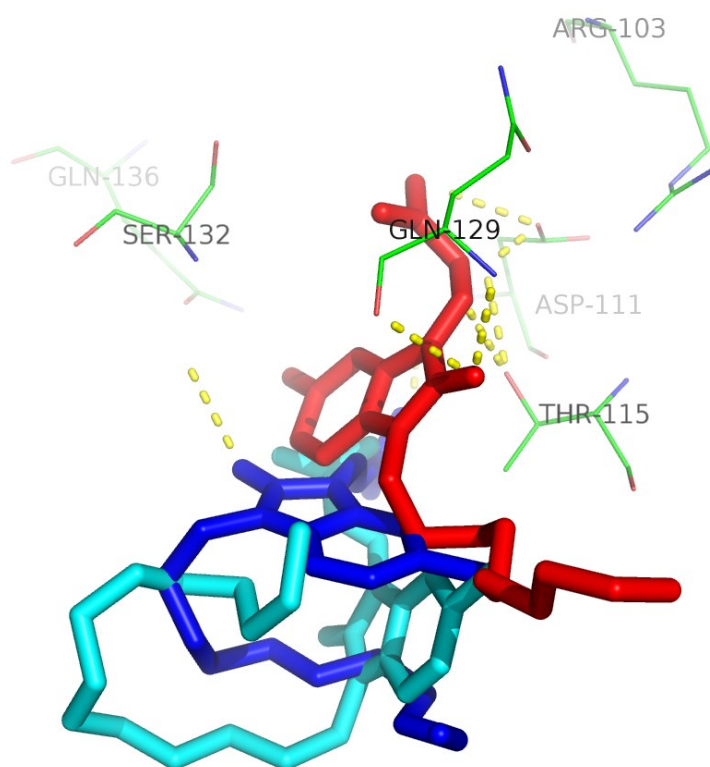

**Figure S5.** (A) Docking models between inhibitors (compound **9**, **10**, **11**) and *S. aureus* monofunctional glycosyltransferase (protein ID: 3HZS): compound **9** (red), **10** (blue), and **11** (cyan). (B) The interactions between **9**, **10**, **11** and *S. aureus* monofunctional glycosyltransferase were generated from AutoDock Tools.

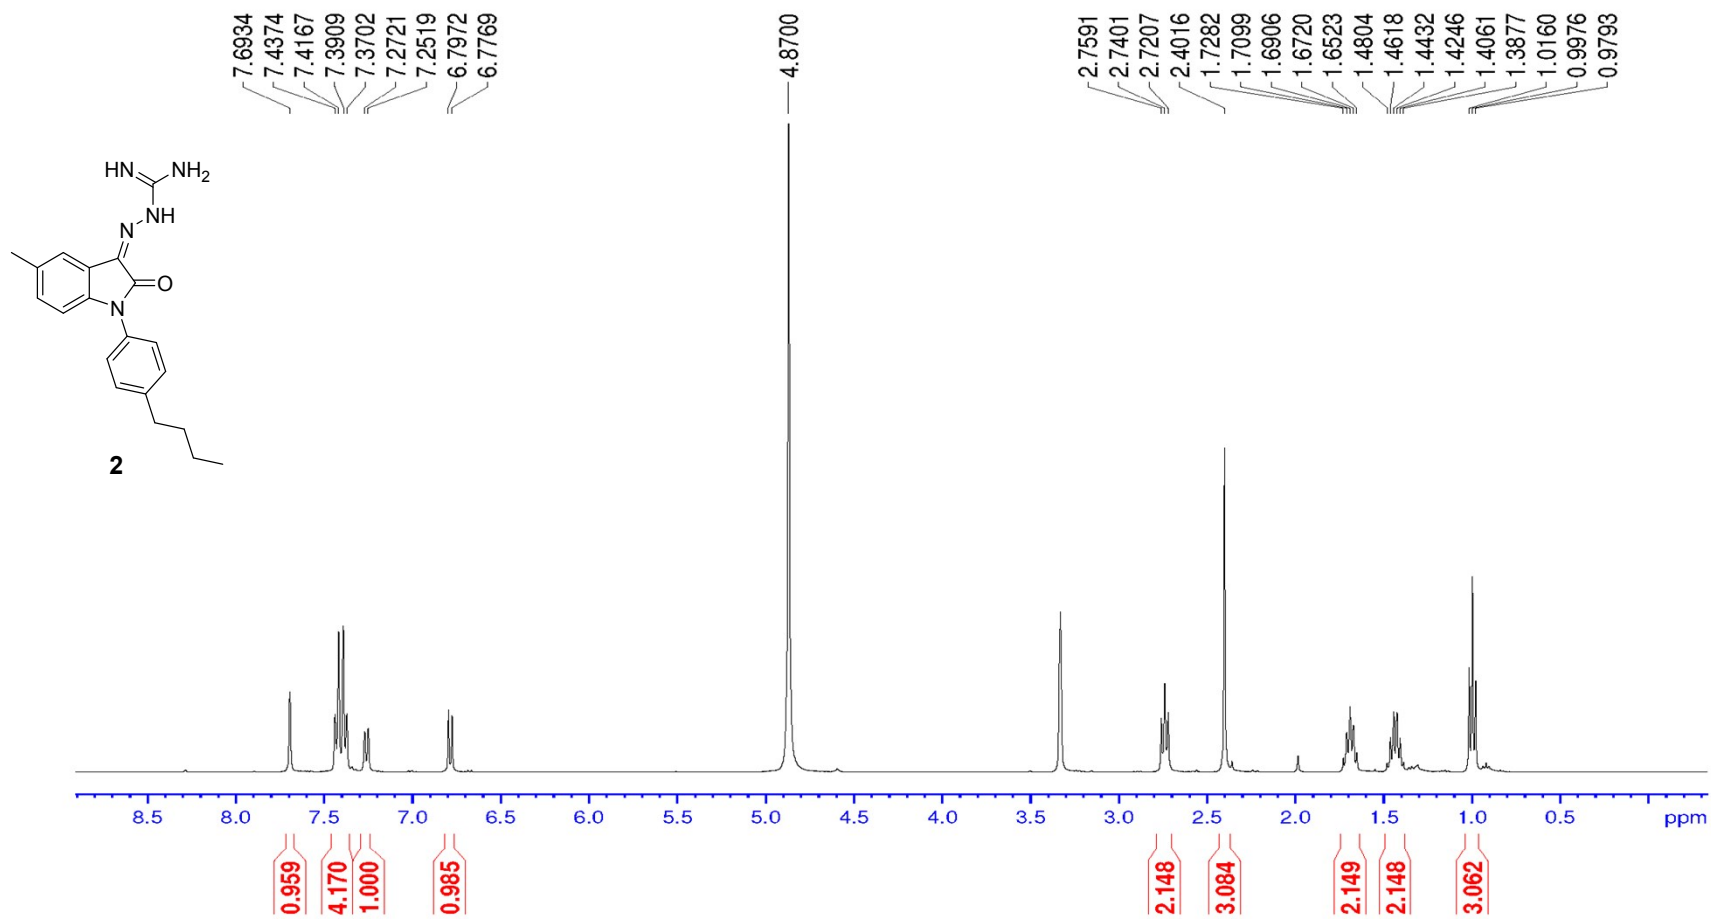

**Figure S6.** <sup>1</sup>H NMR (400 MHz, CD<sub>3</sub>OD) for compound 2



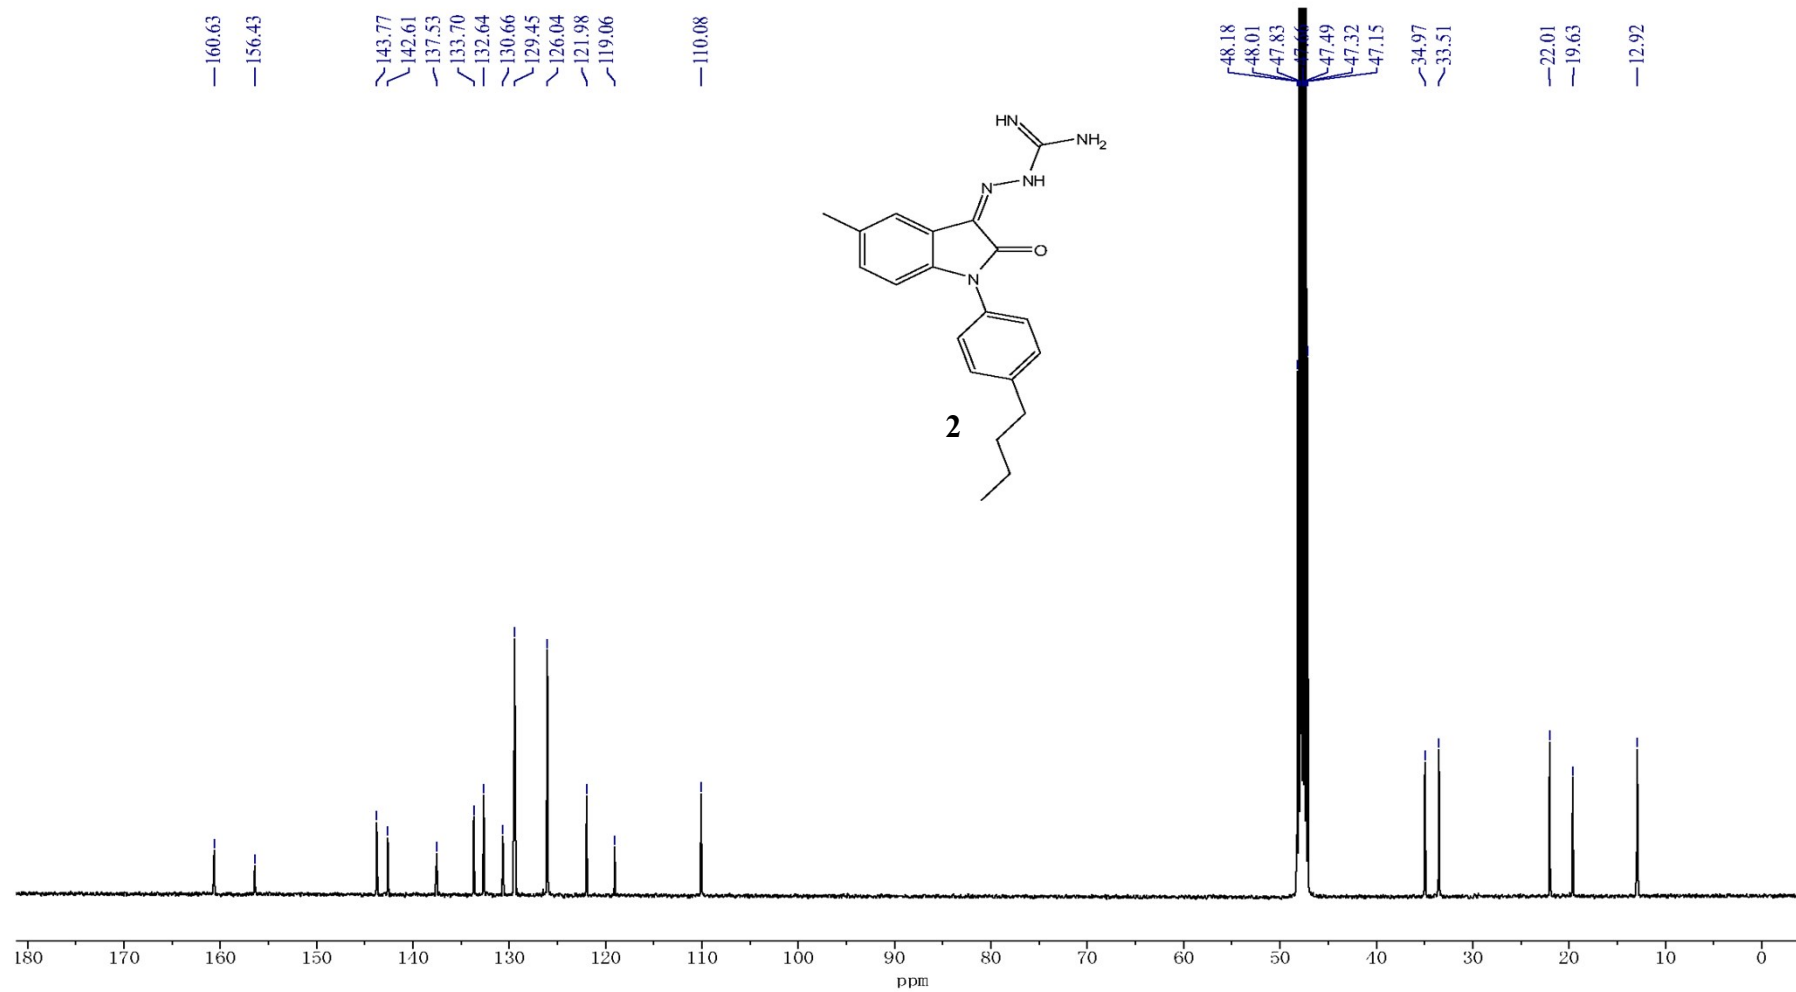

**Figure S7.** <sup>13</sup>C NMR (125 MHz, CD<sub>3</sub>OD) for compound 2

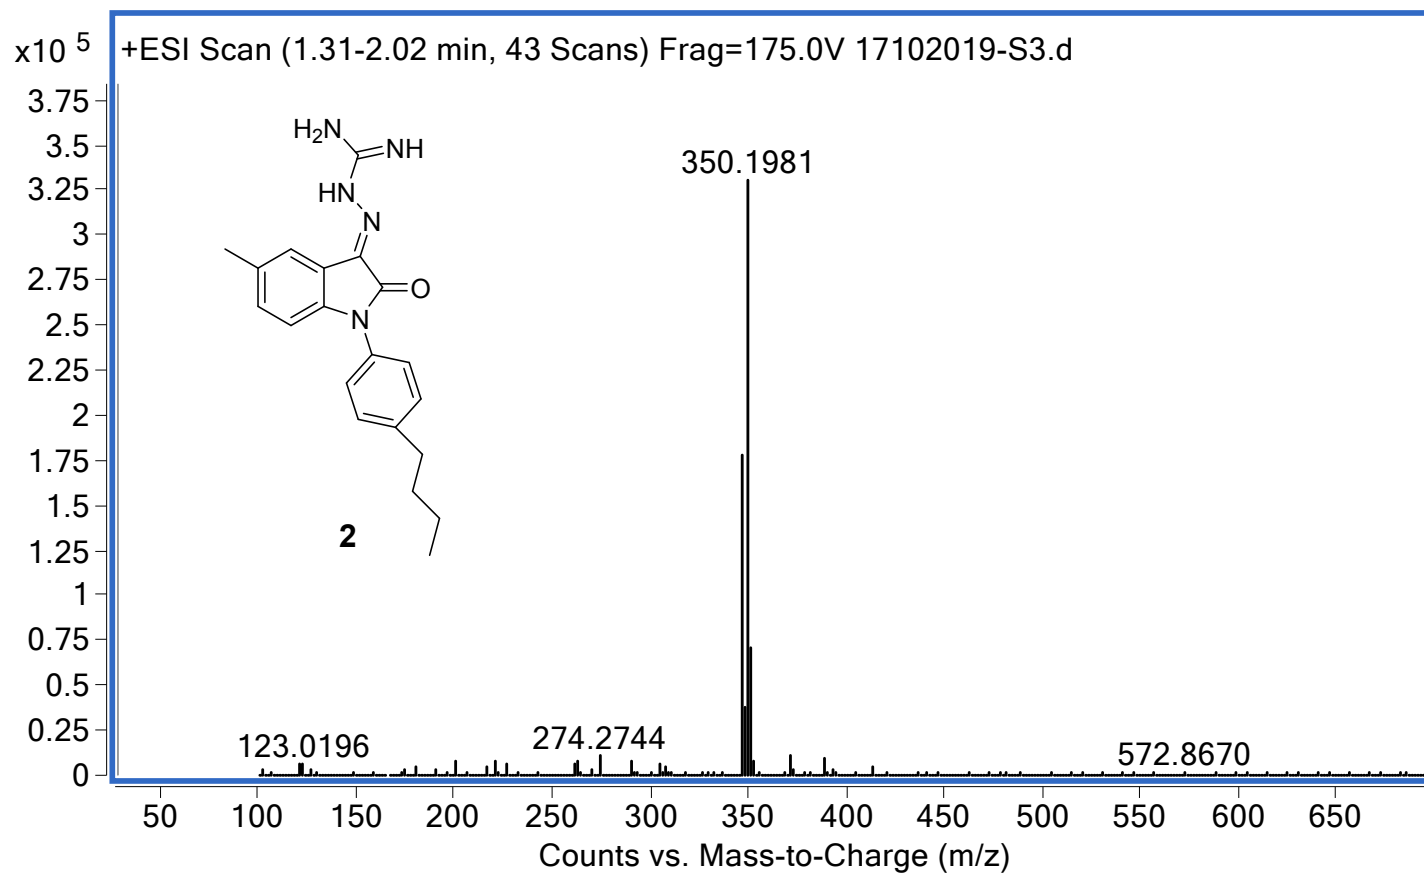

**Figure S8.** HRMS results for compound **2**

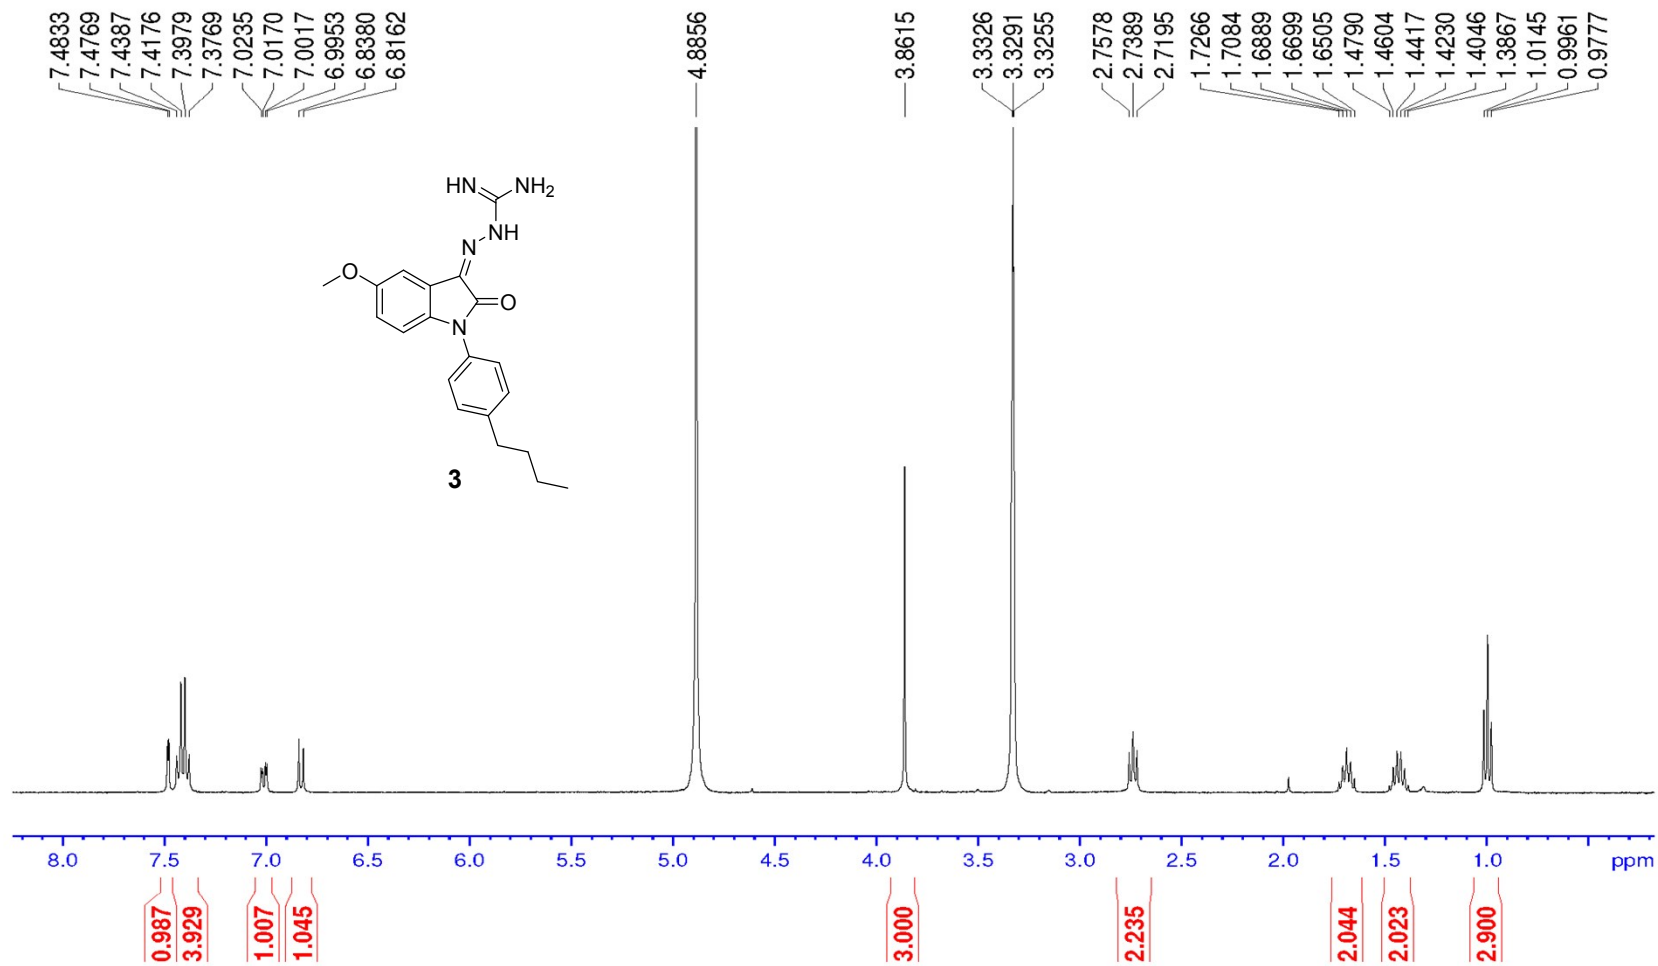

Figure S9. <sup>1</sup>H NMR (400 MHz, CD<sub>3</sub>OD) for compound **3**

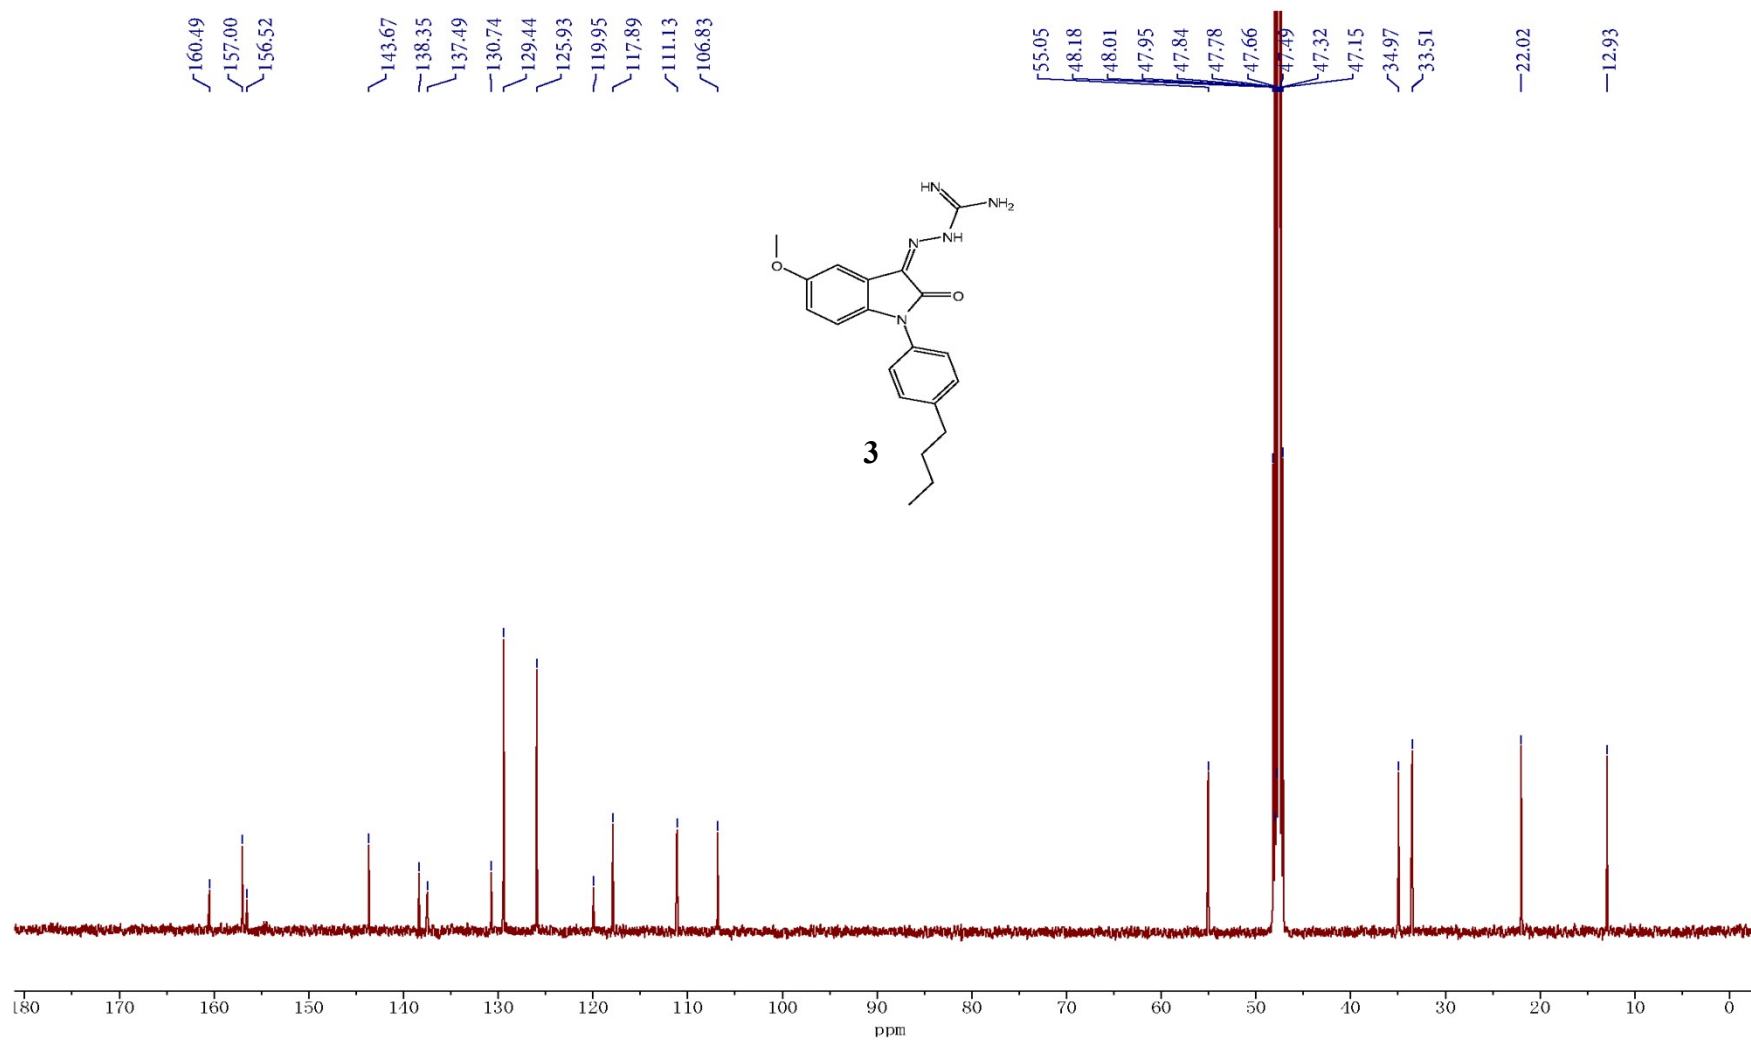

Figure S10. <sup>13</sup>C NMR (125 MHz, CD<sub>3</sub>OD) for compound **3**

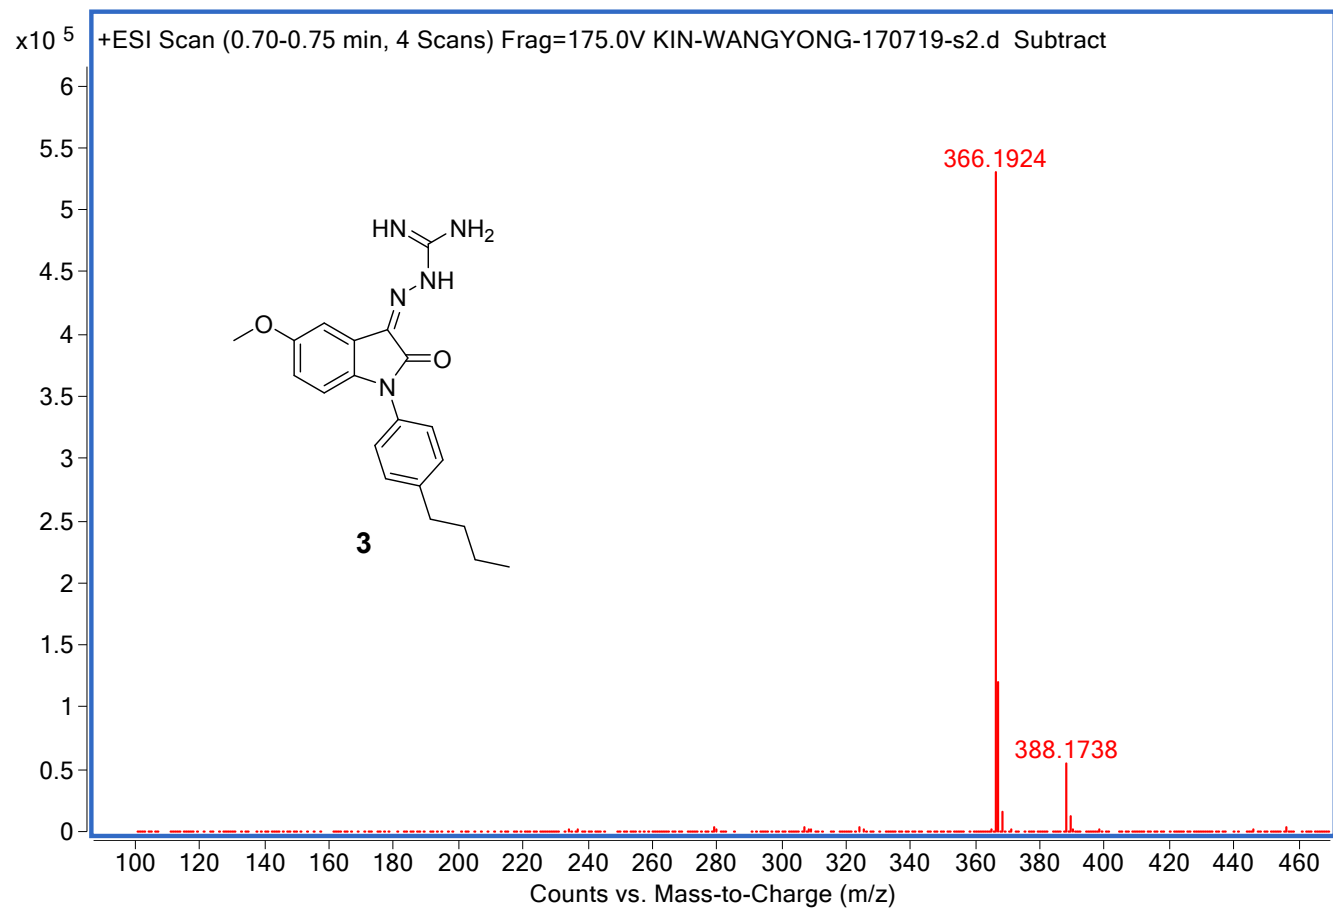

**Figure S11.** HRMS results for compound **3**

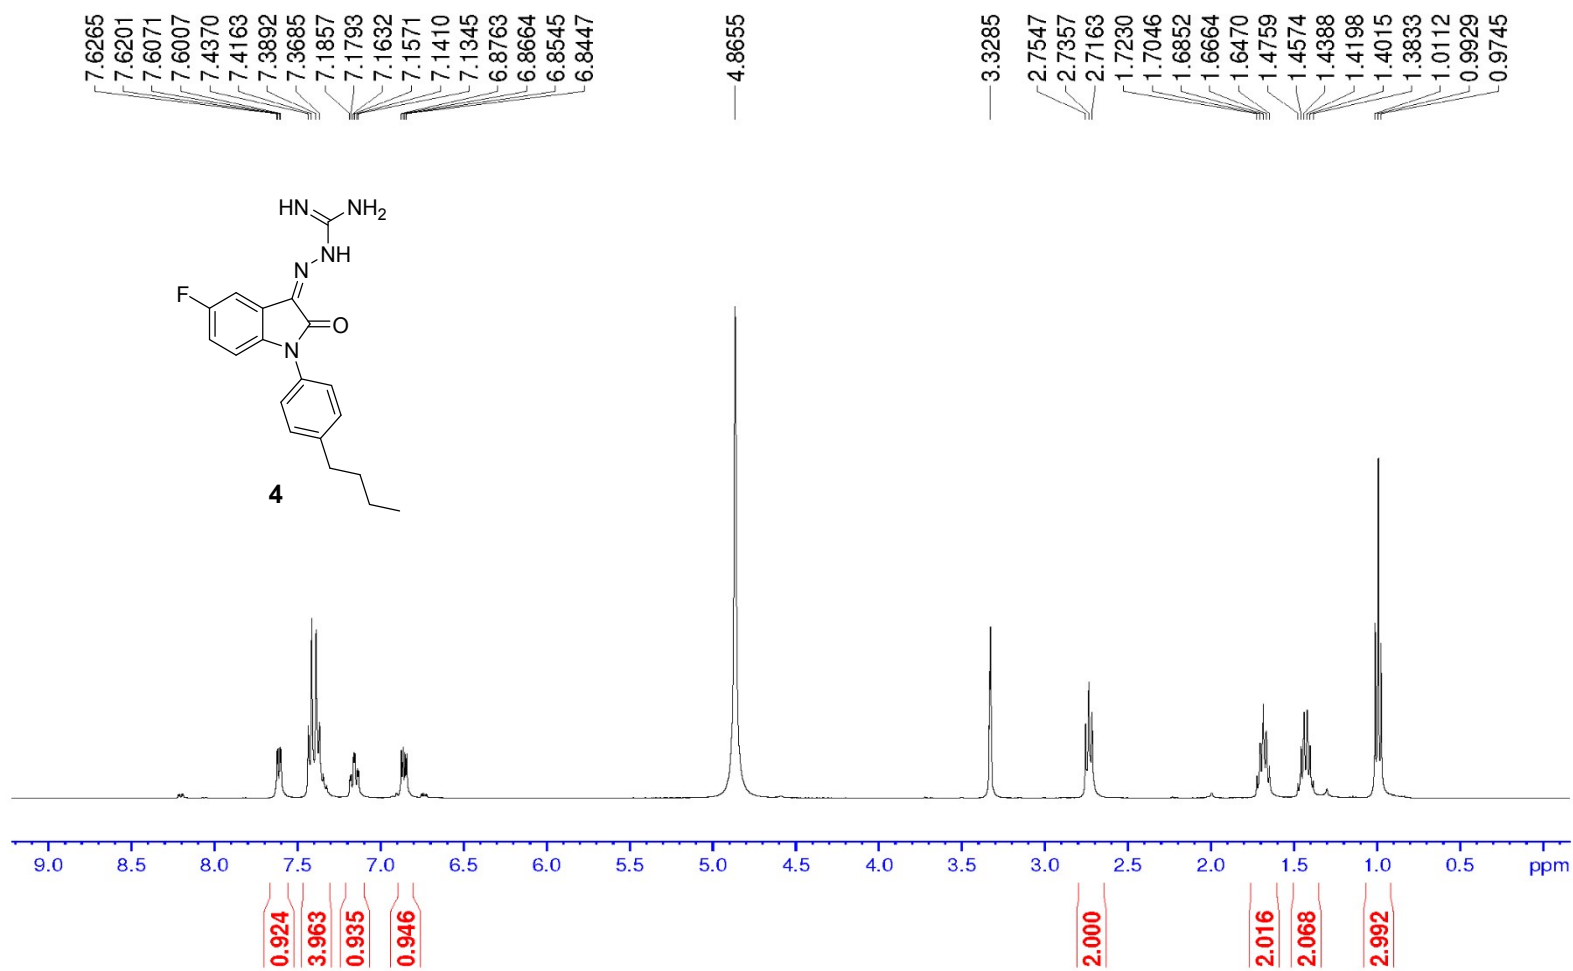

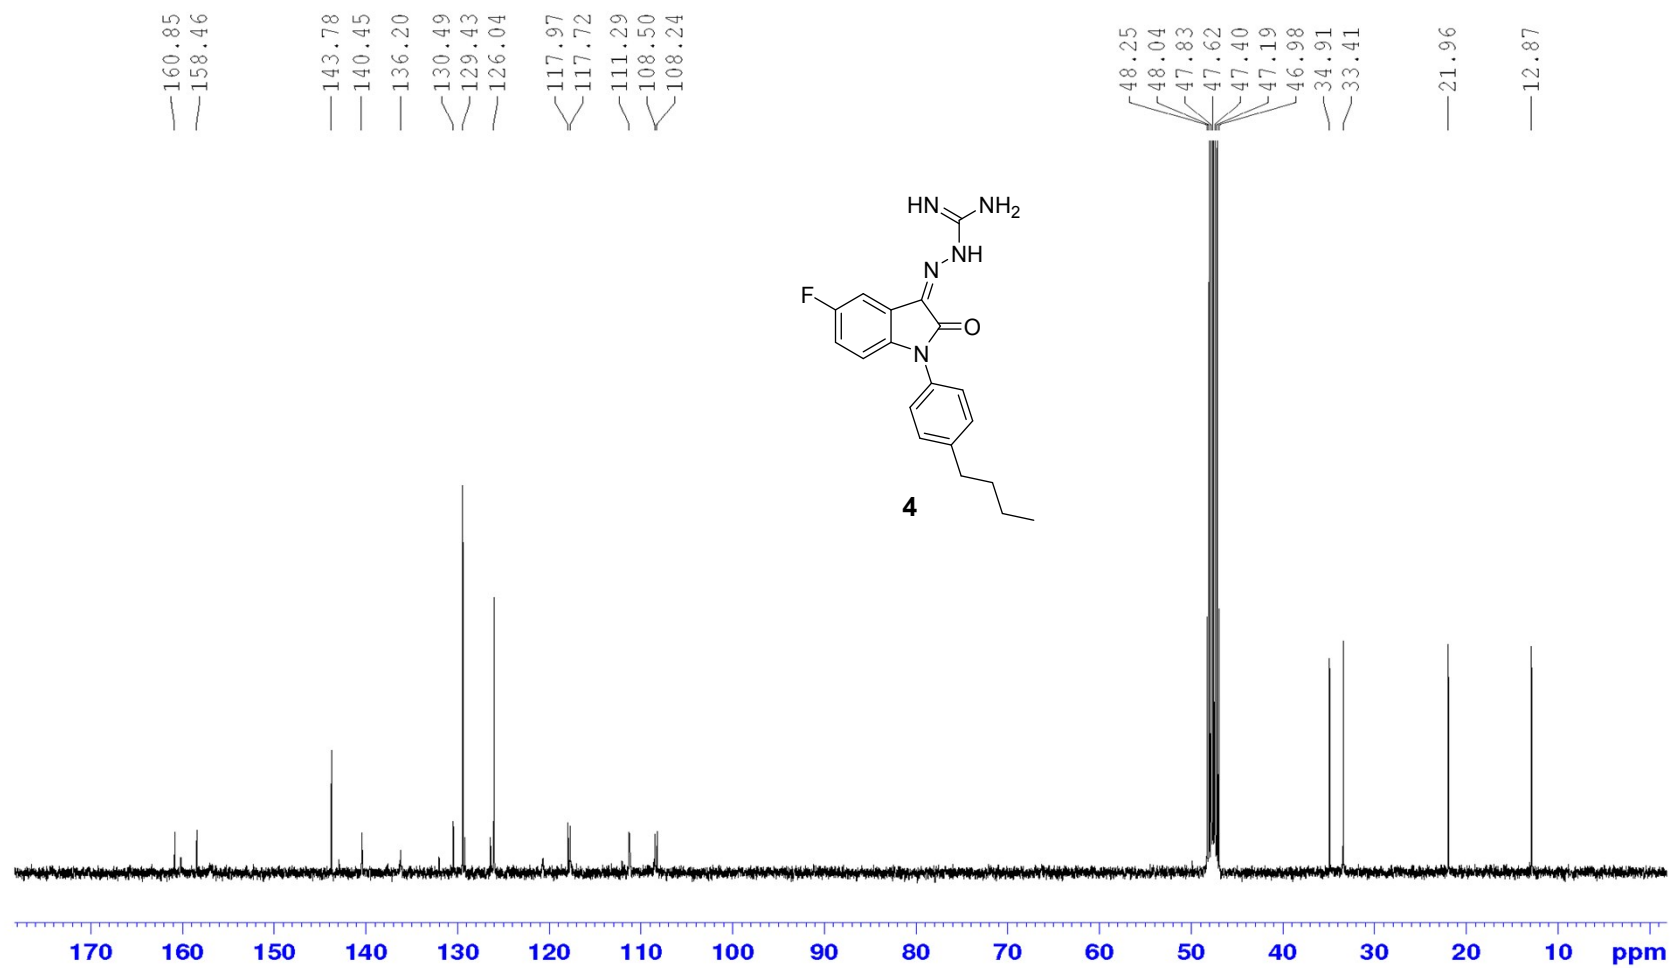

Figure S13. <sup>13</sup>C NMR (125 MHz, CD<sub>3</sub>OD) for compound 4

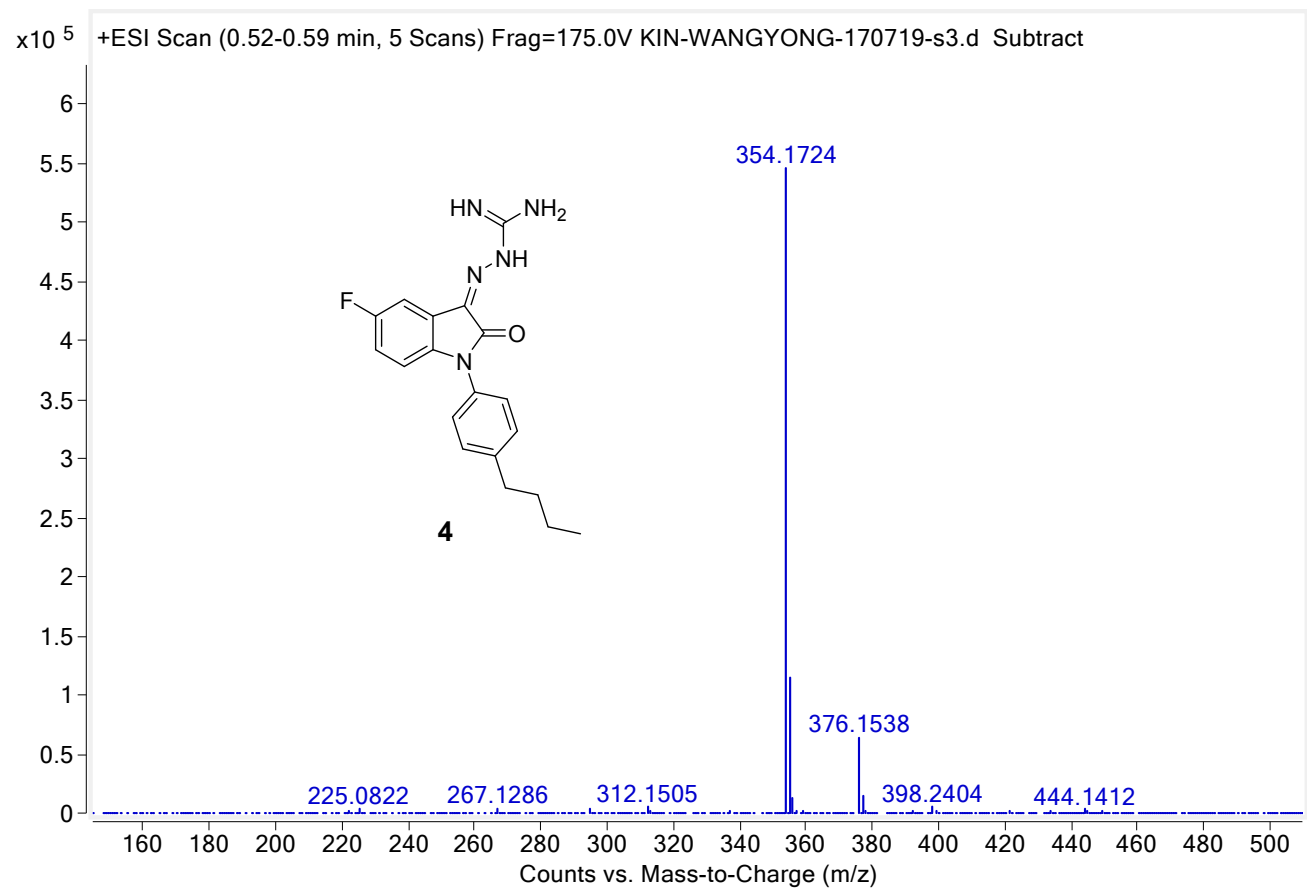

**Figure S14.** HRMS results for compound **4**



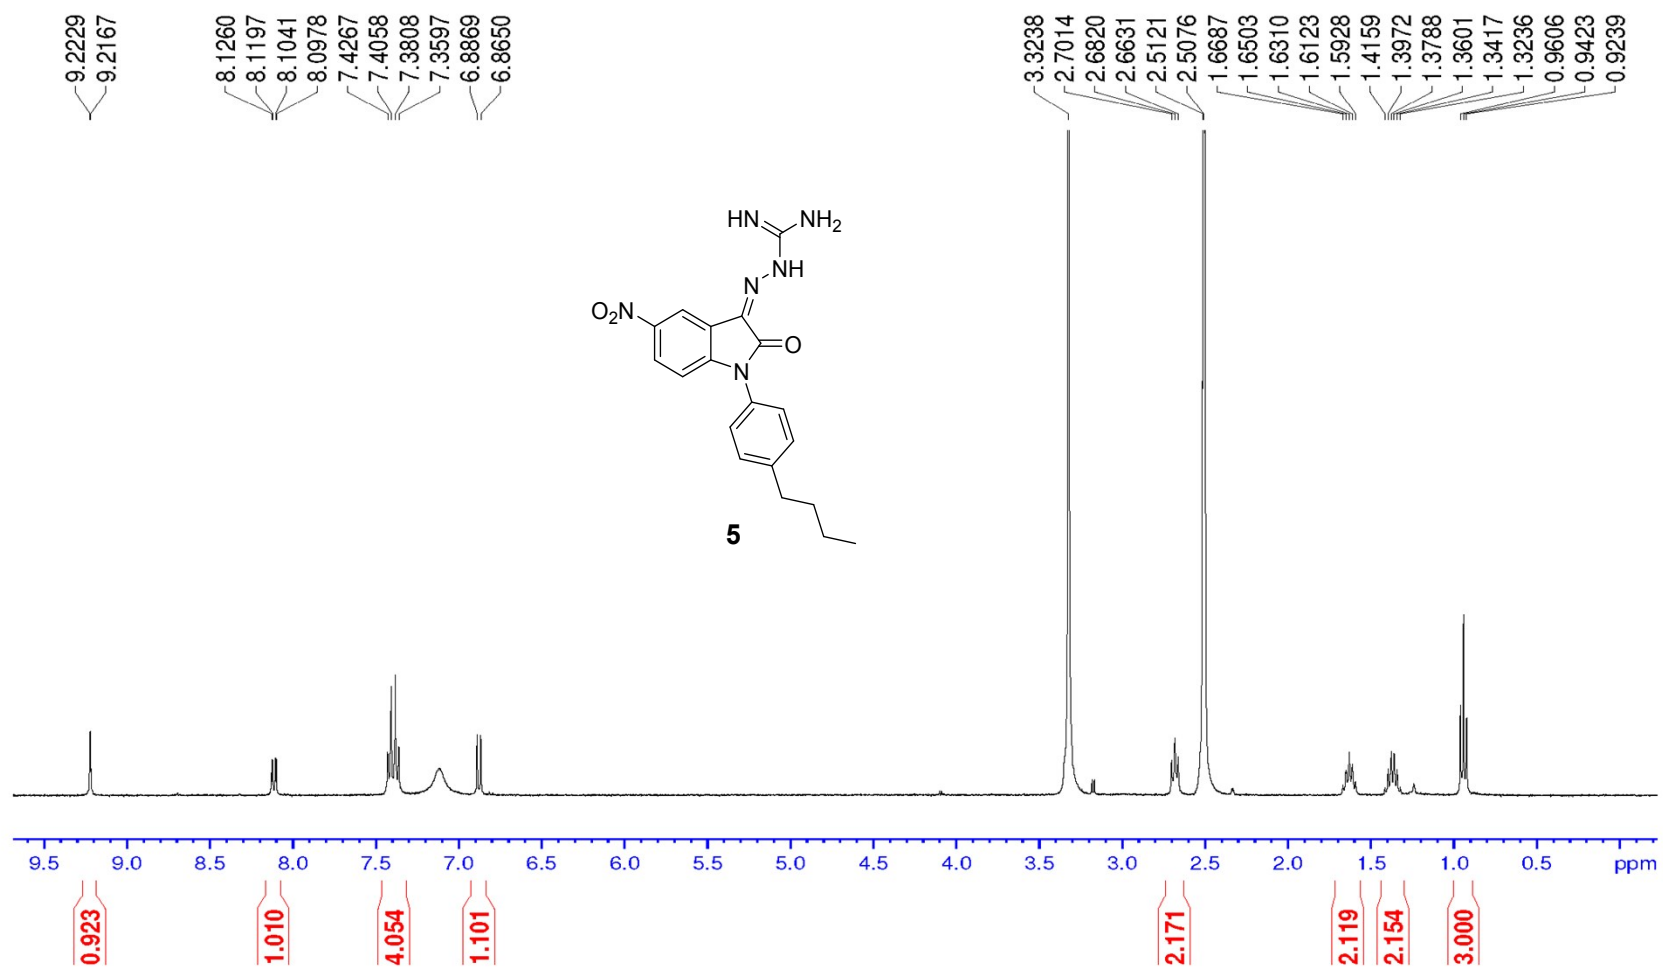

Figure S15. <sup>1</sup>H NMR (400 MHz, CD<sub>3</sub>OD) for compound 5

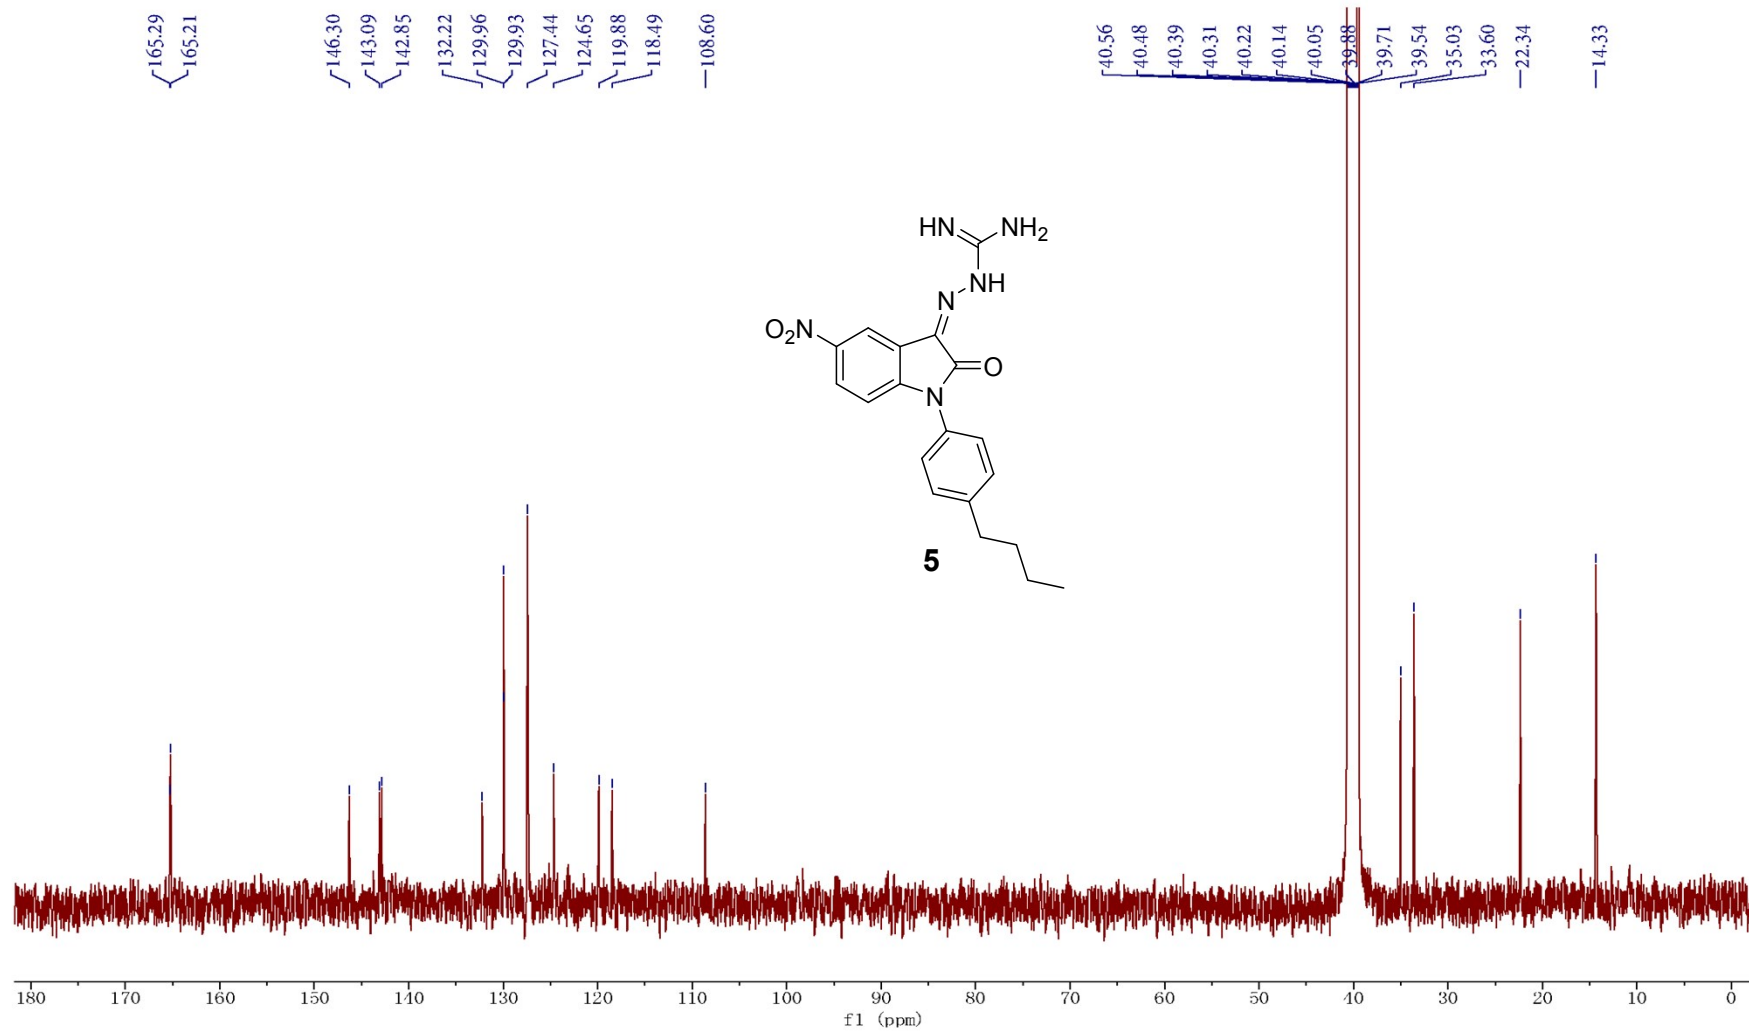

**Figure S16.** <sup>13</sup>C NMR (125 MHz, CD<sub>3</sub>OD) for compound **5**

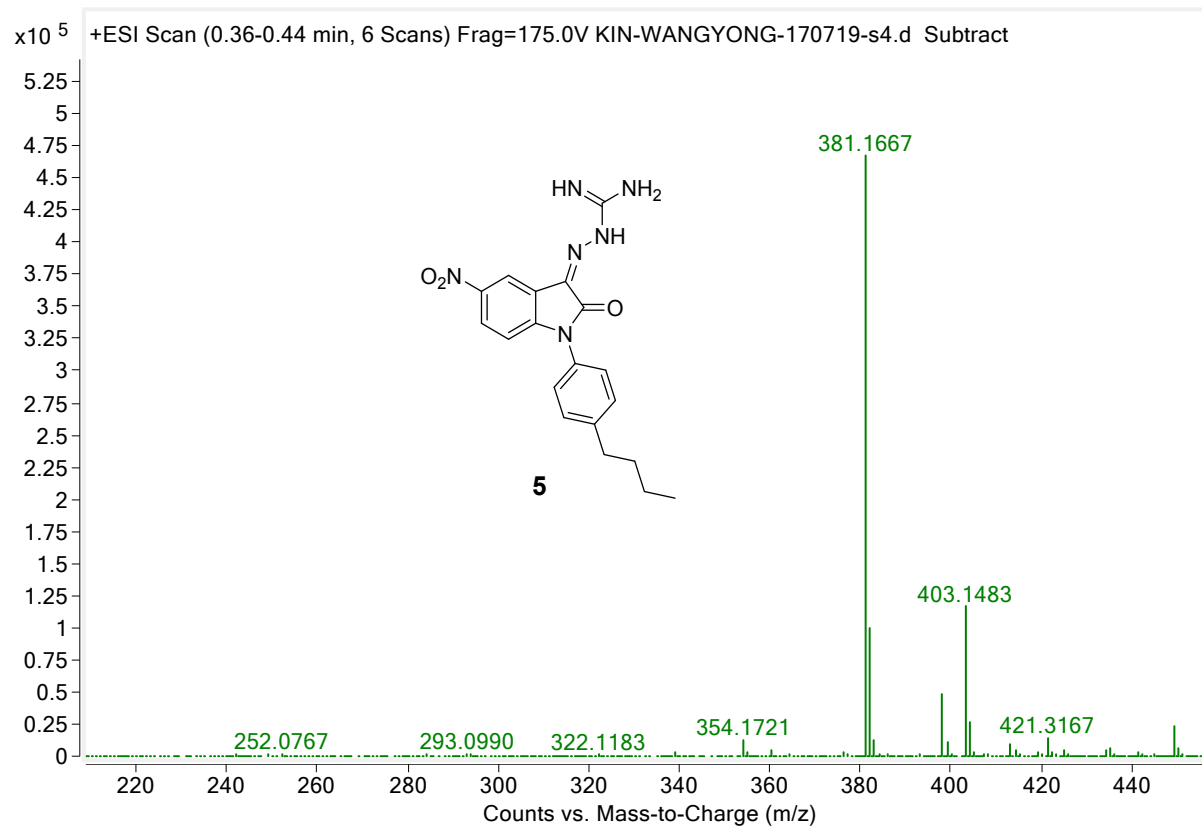

**Figure S17.** HRMS results for compound **5**

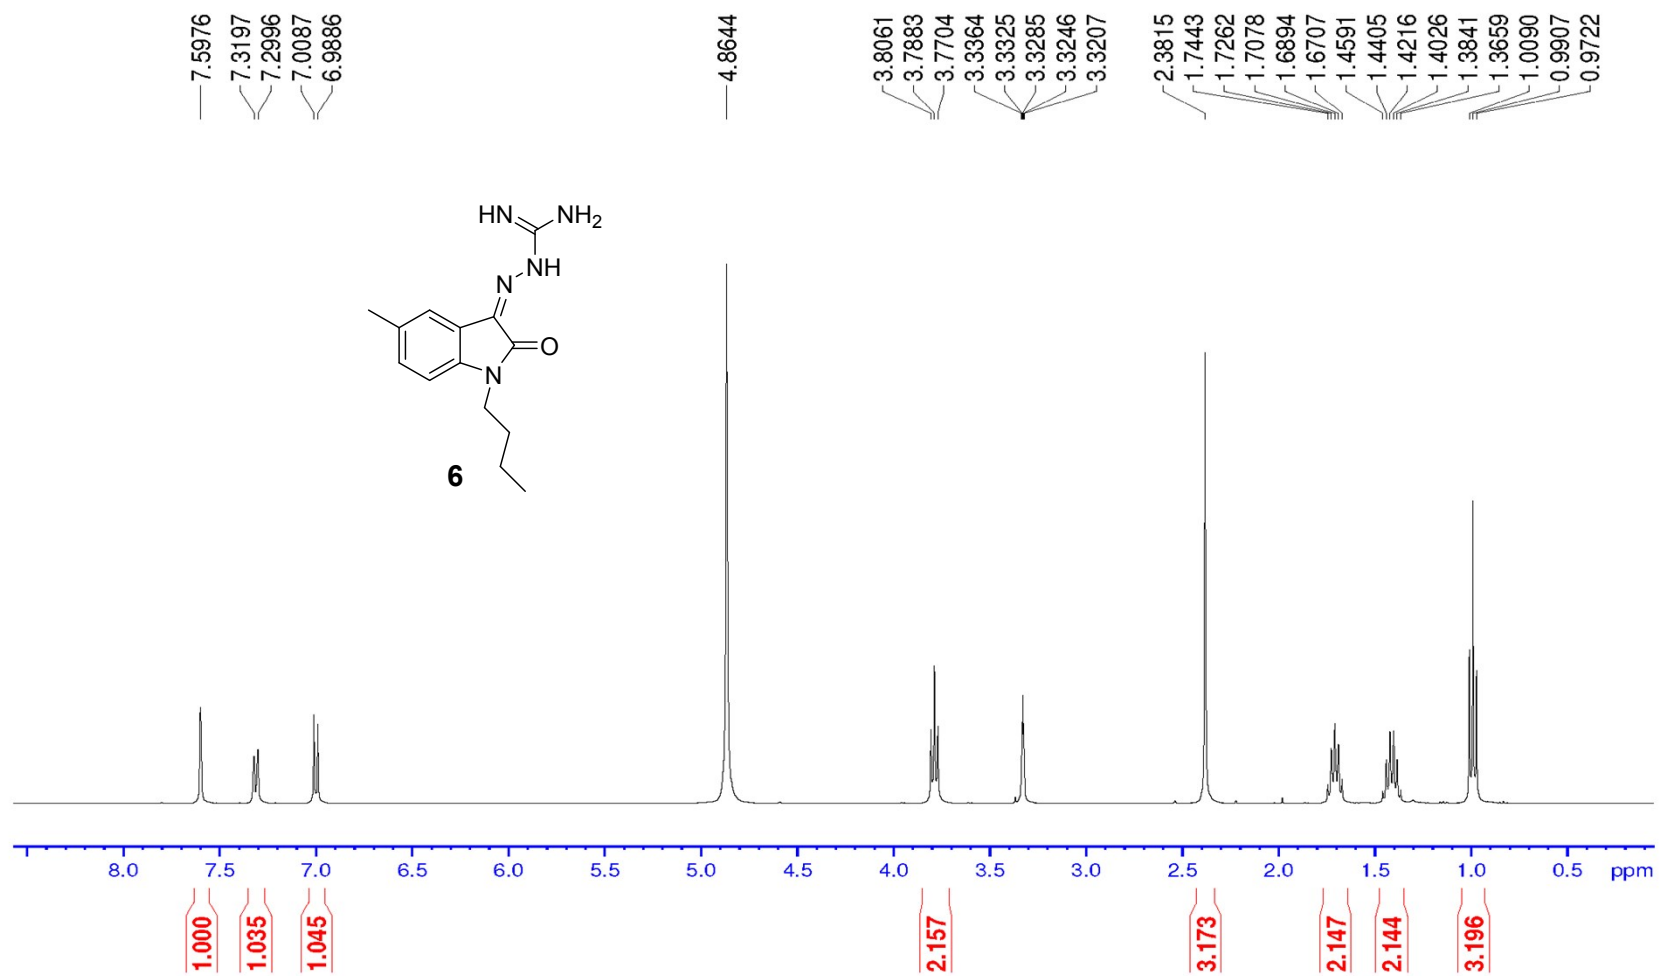

Figure S18. <sup>1</sup>H NMR (400 MHz, CD<sub>3</sub>OD) for compound 6

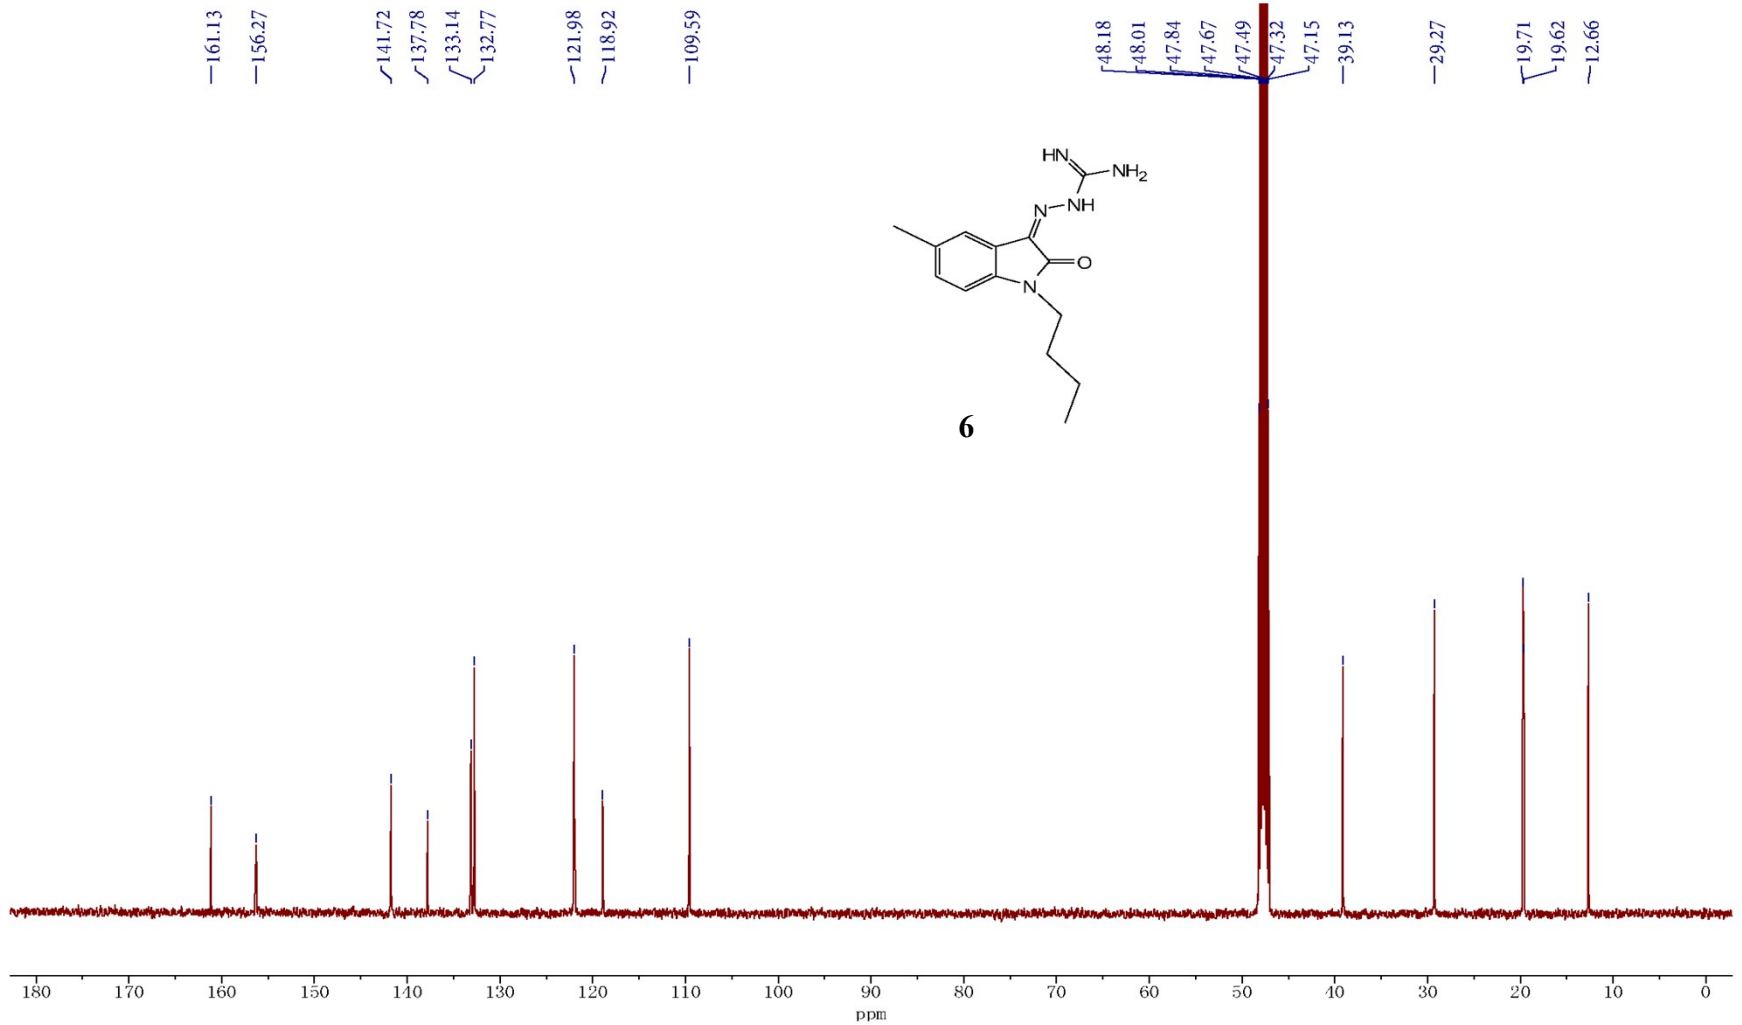

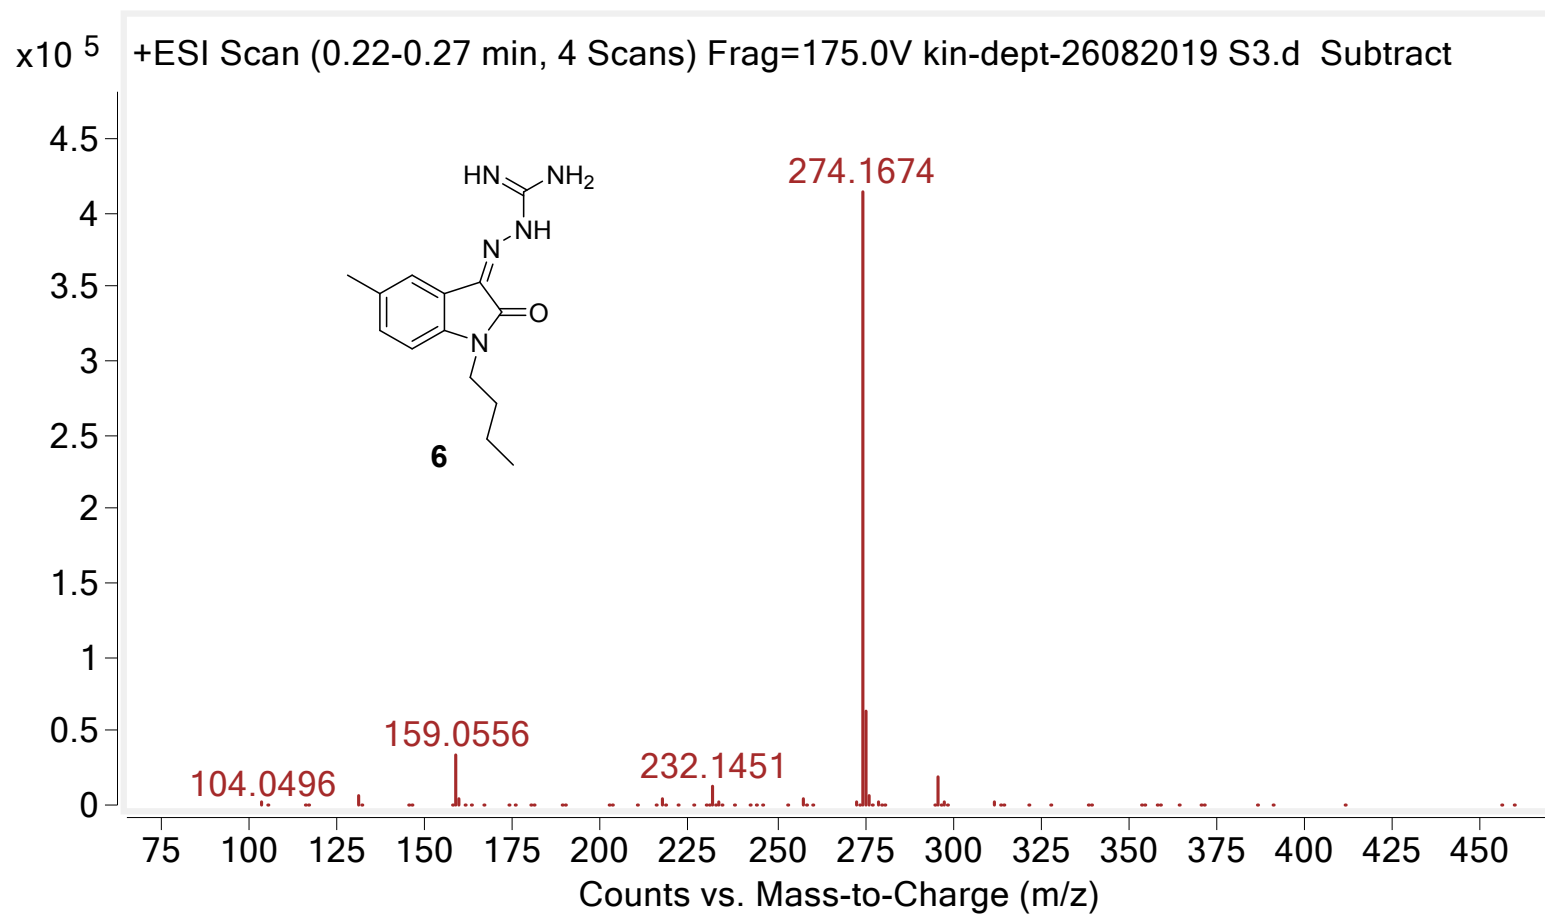

**Figure S20.** HRMS results for compound **6**

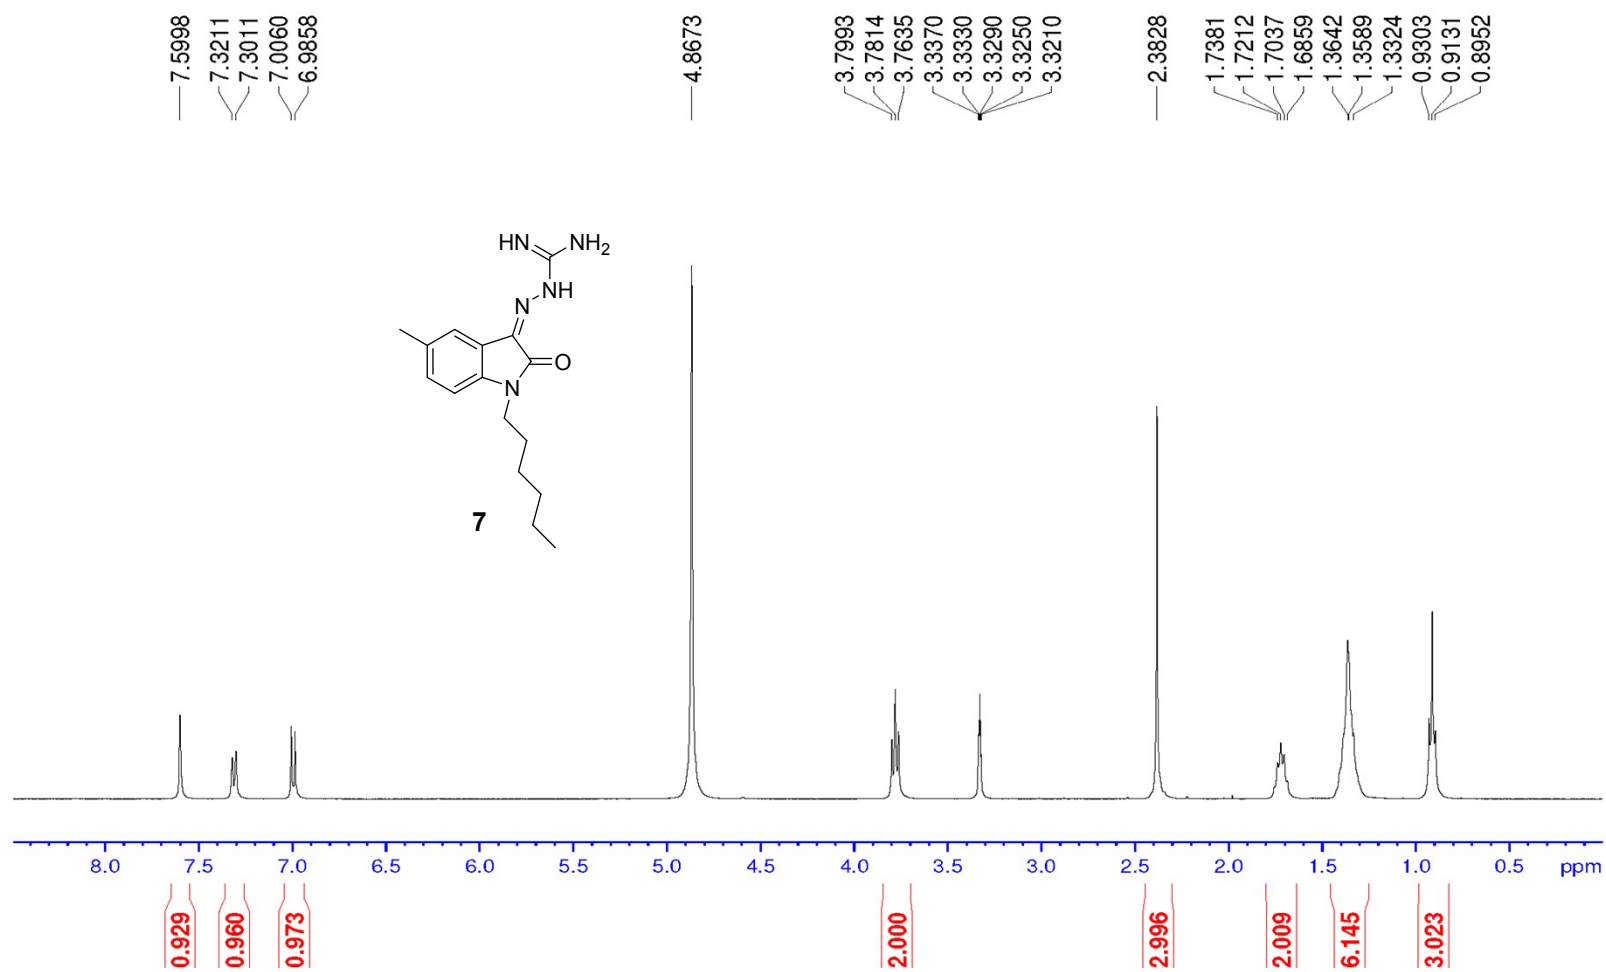

**Figure S21.**  $^1\text{H}$  NMR (400 MHz,  $\text{CD}_3\text{OD}$ ) for compound **7**

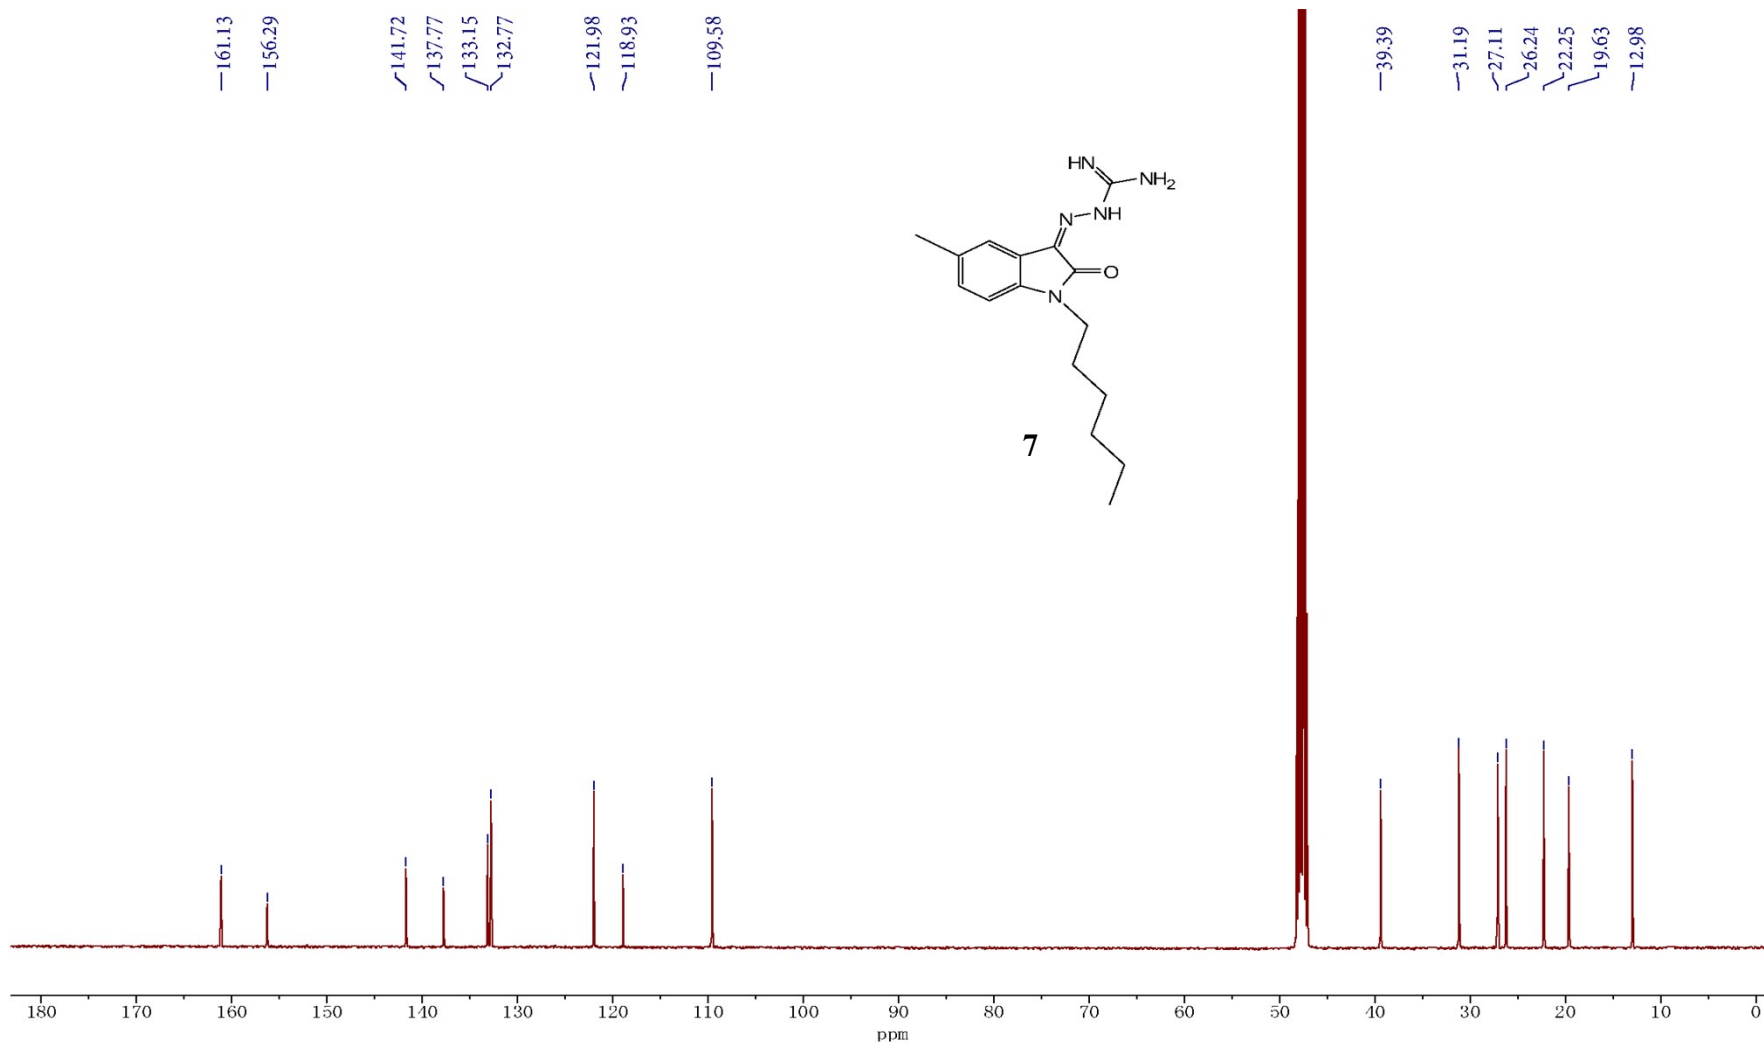

Figure S22.  $^{13}\text{C}$  NMR (125 MHz,  $\text{CD}_3\text{OD}$ ) for compound 7



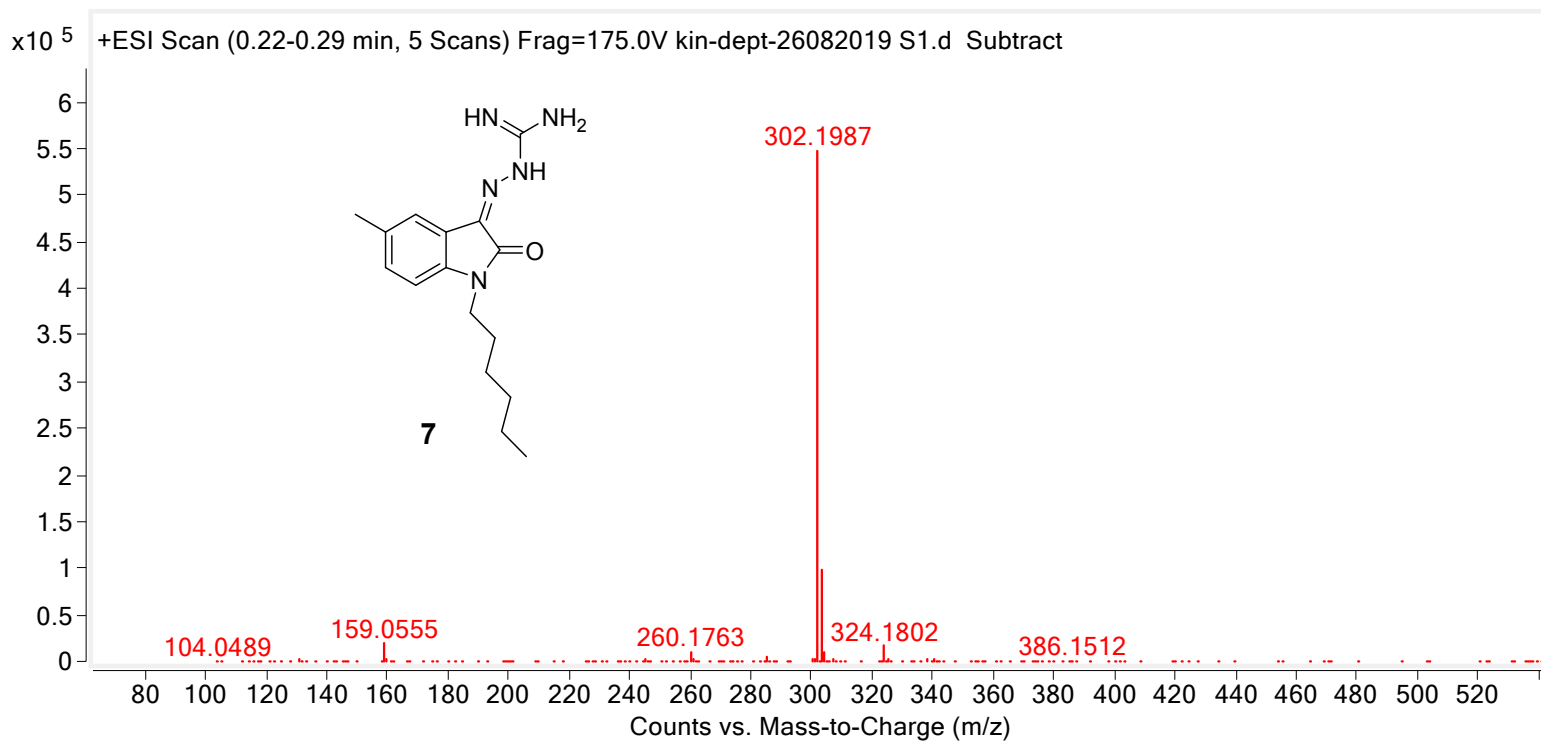

**Figure S23.** HRMS results for compound 7

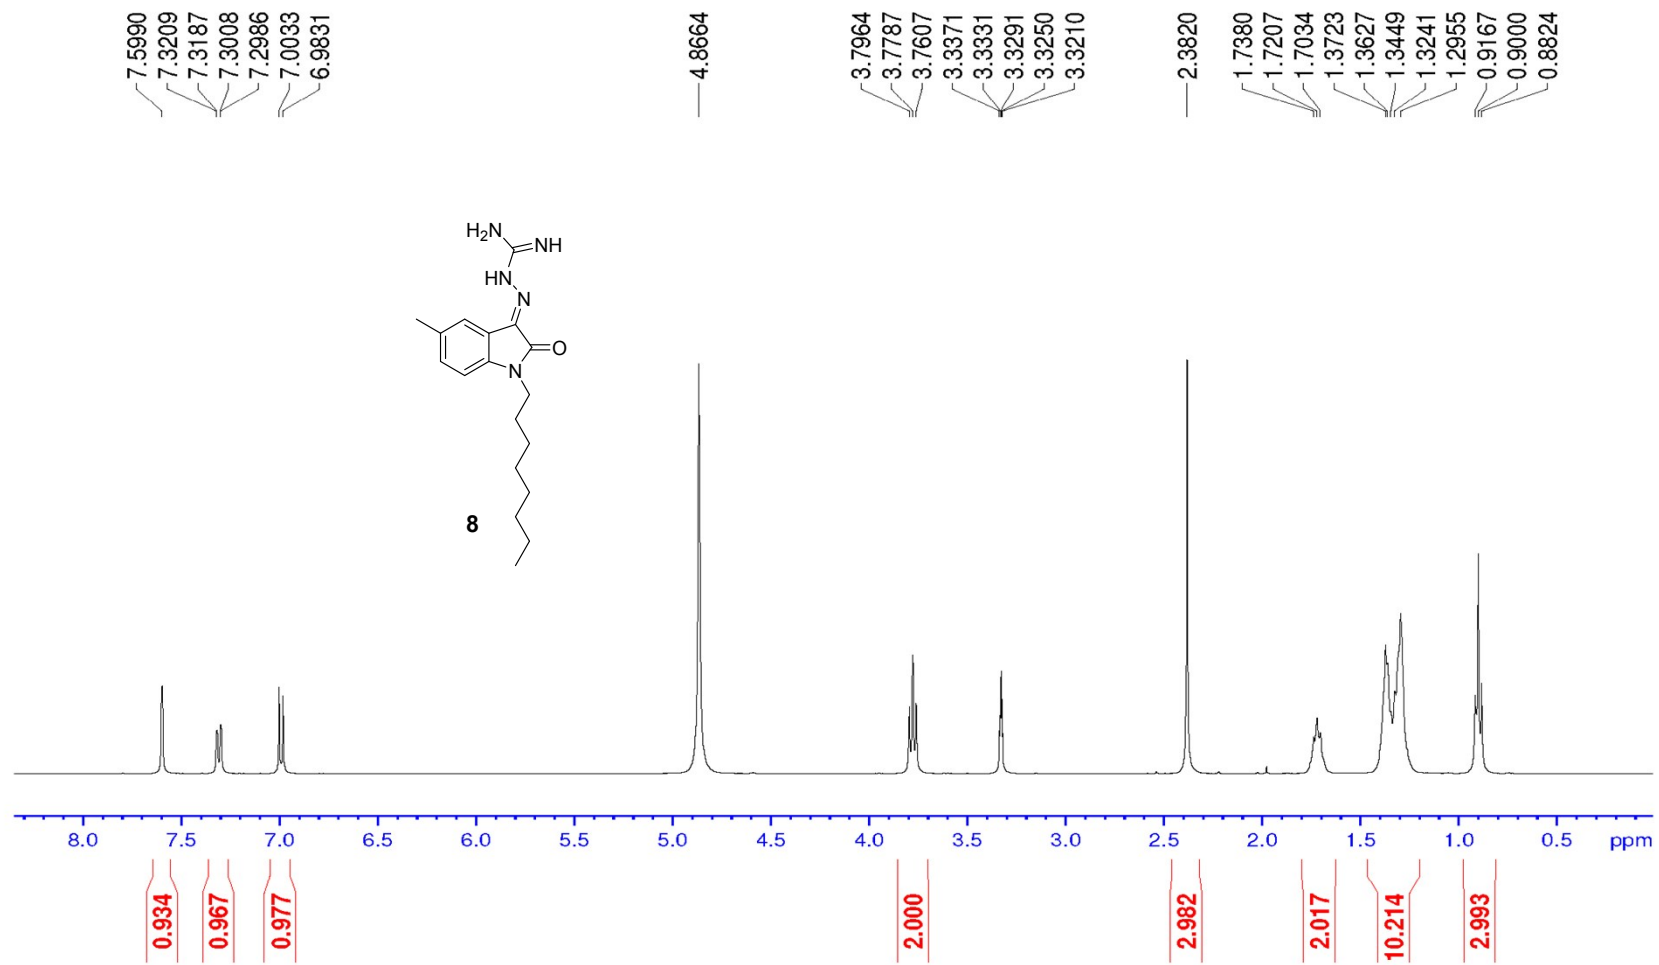

**Figure S24.**  $^1\text{H}$  NMR (400 MHz,  $\text{CD}_3\text{OD}$ ) for compound **8**

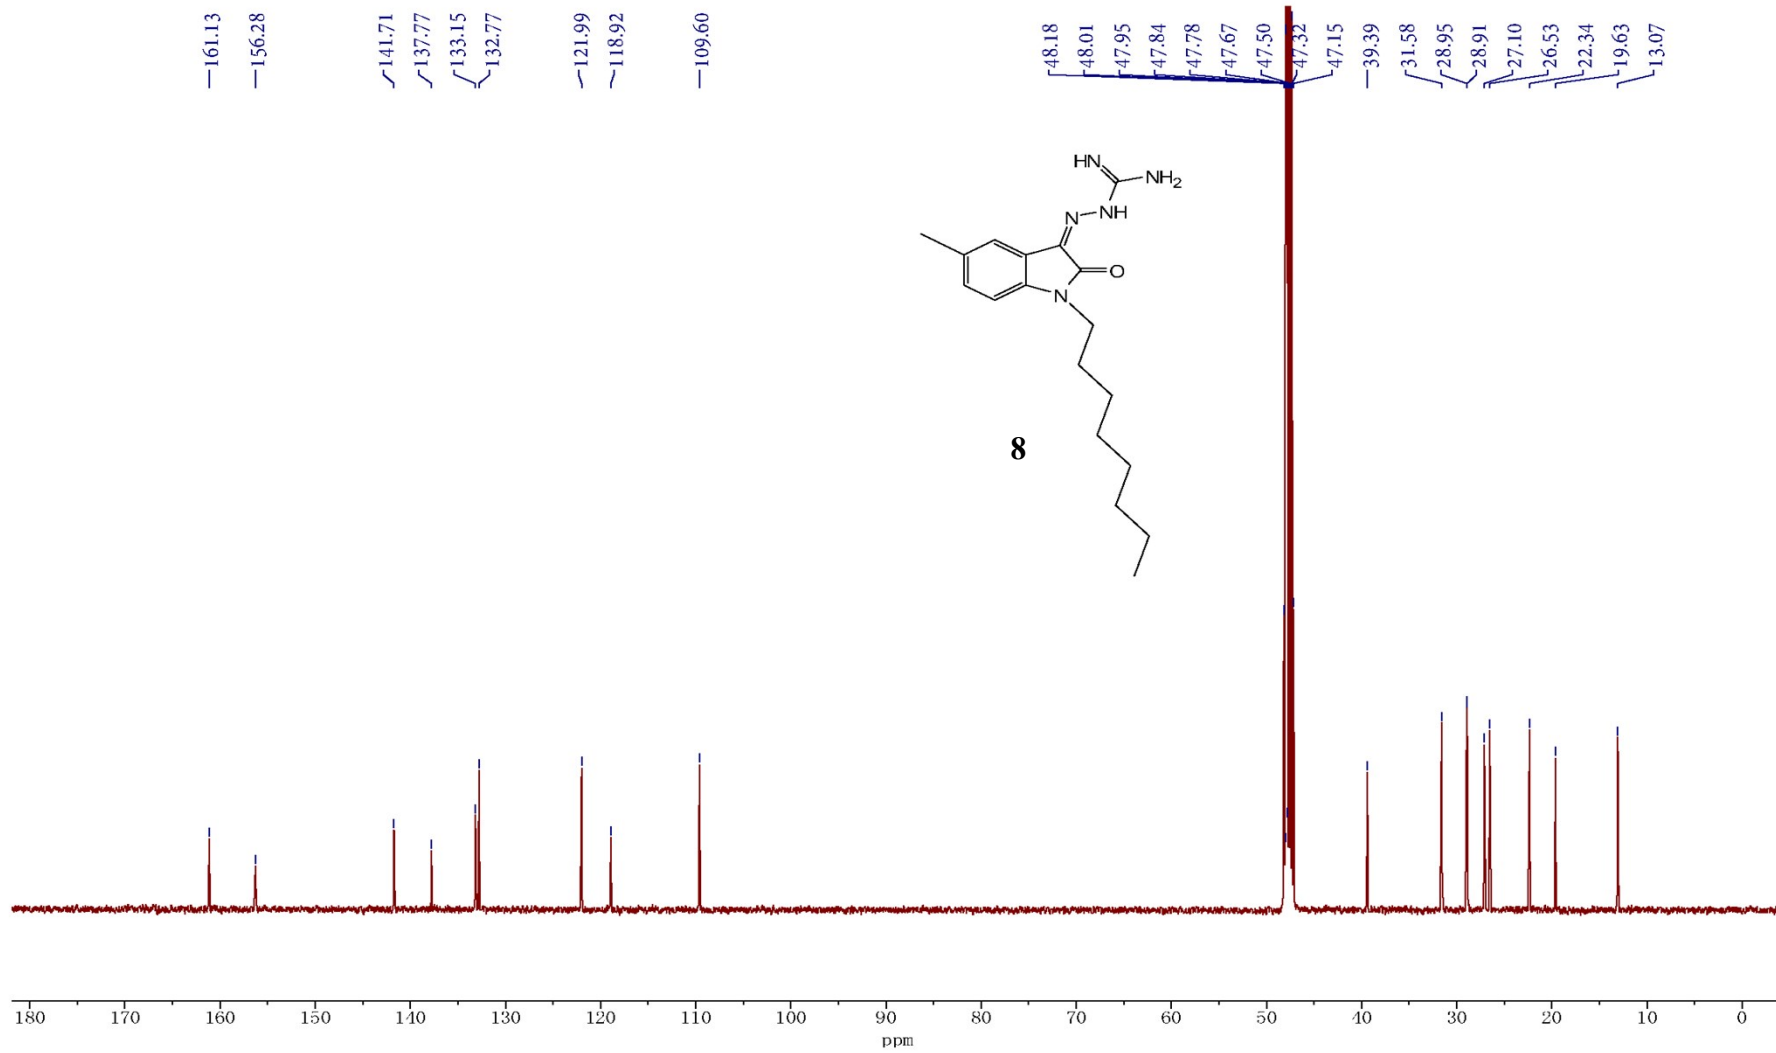

Figure S25. <sup>13</sup>C NMR (125 MHz, CD<sub>3</sub>OD) for compound **8**

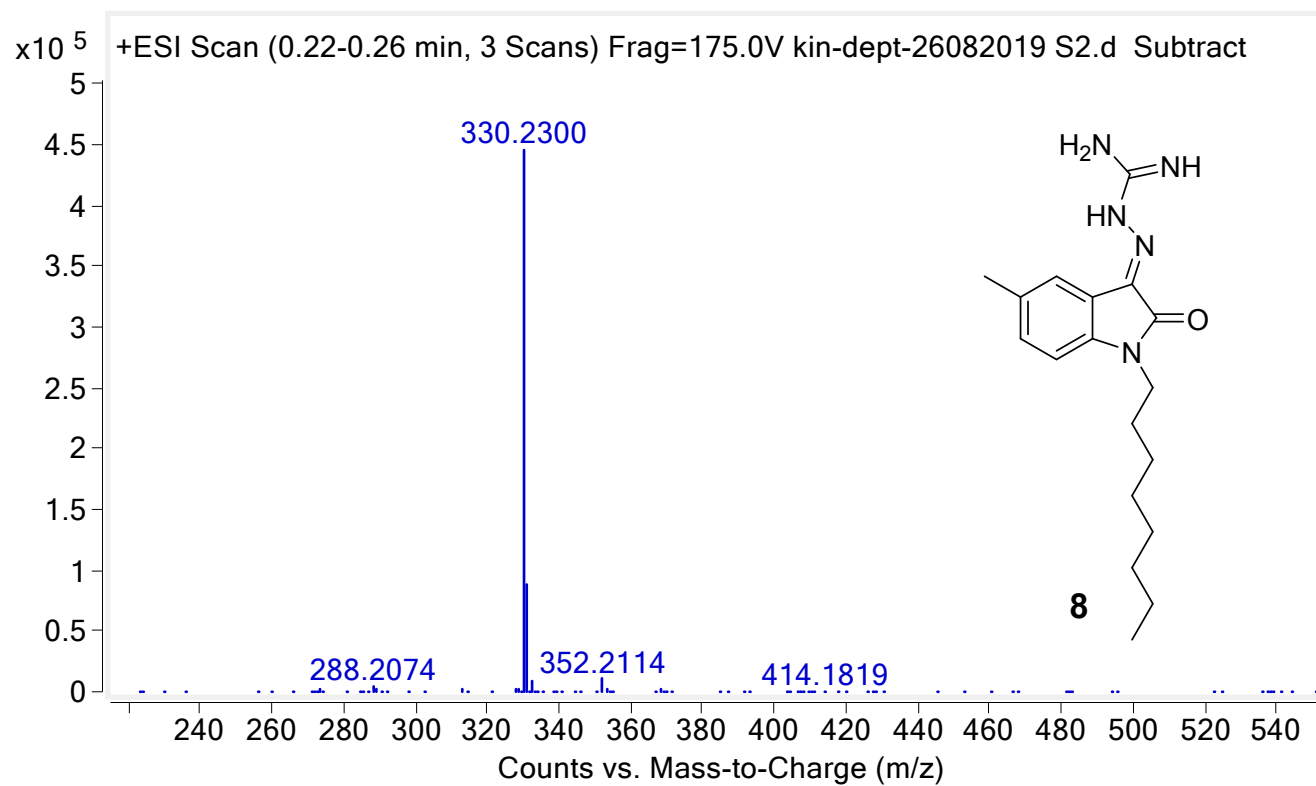

**Figure S26.** HRMS results for compound **8**

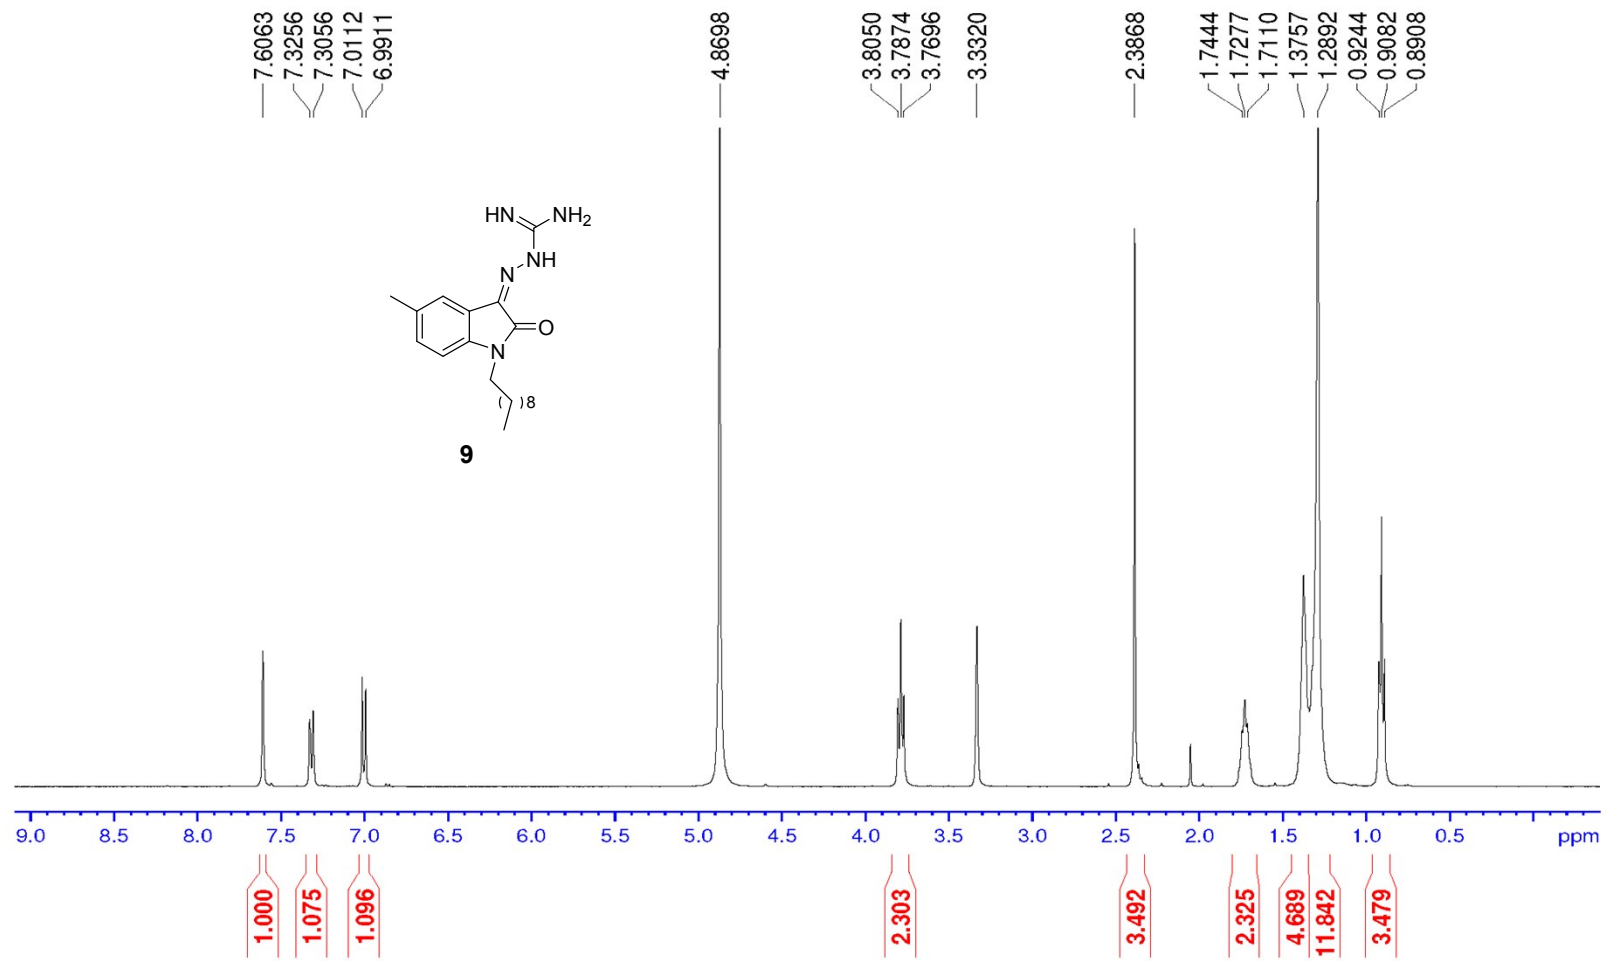

Figure S27. <sup>1</sup>H NMR (400 MHz, CD<sub>3</sub>OD) for compound **9**

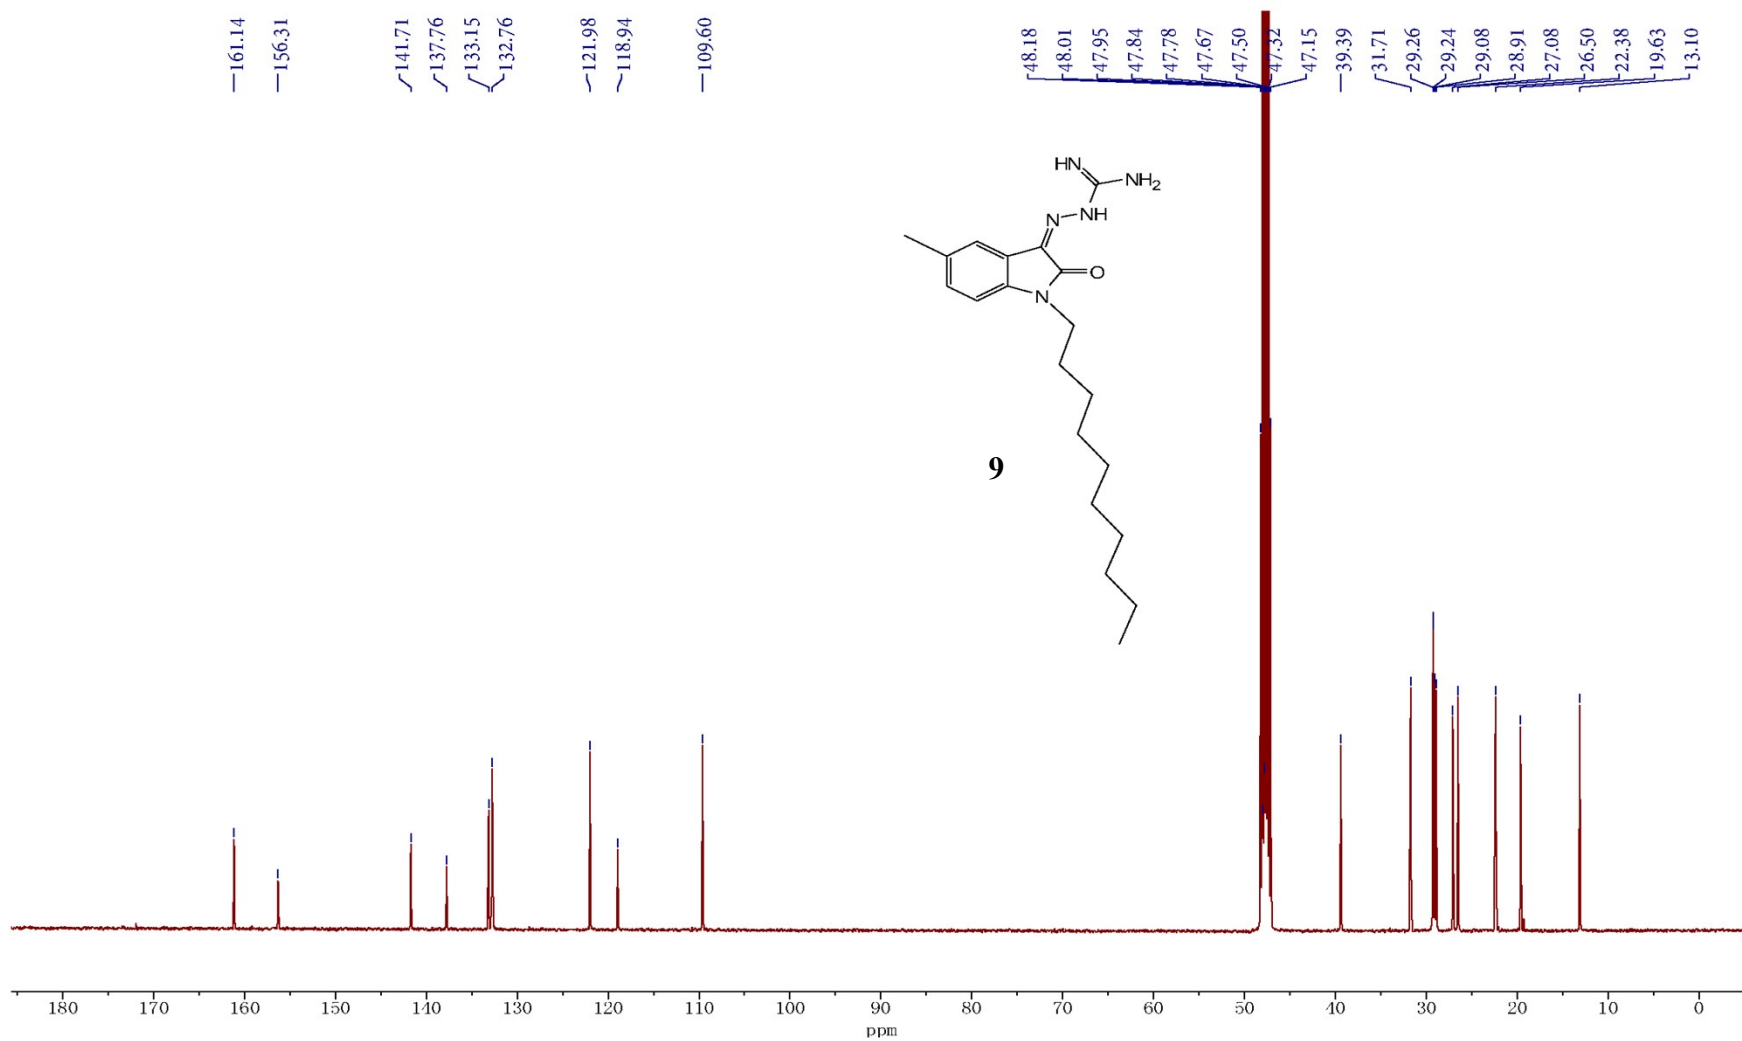

Figure S28.  $^{13}\text{C}$  NMR (125 MHz,  $\text{CD}_3\text{OD}$ ) for compound 9

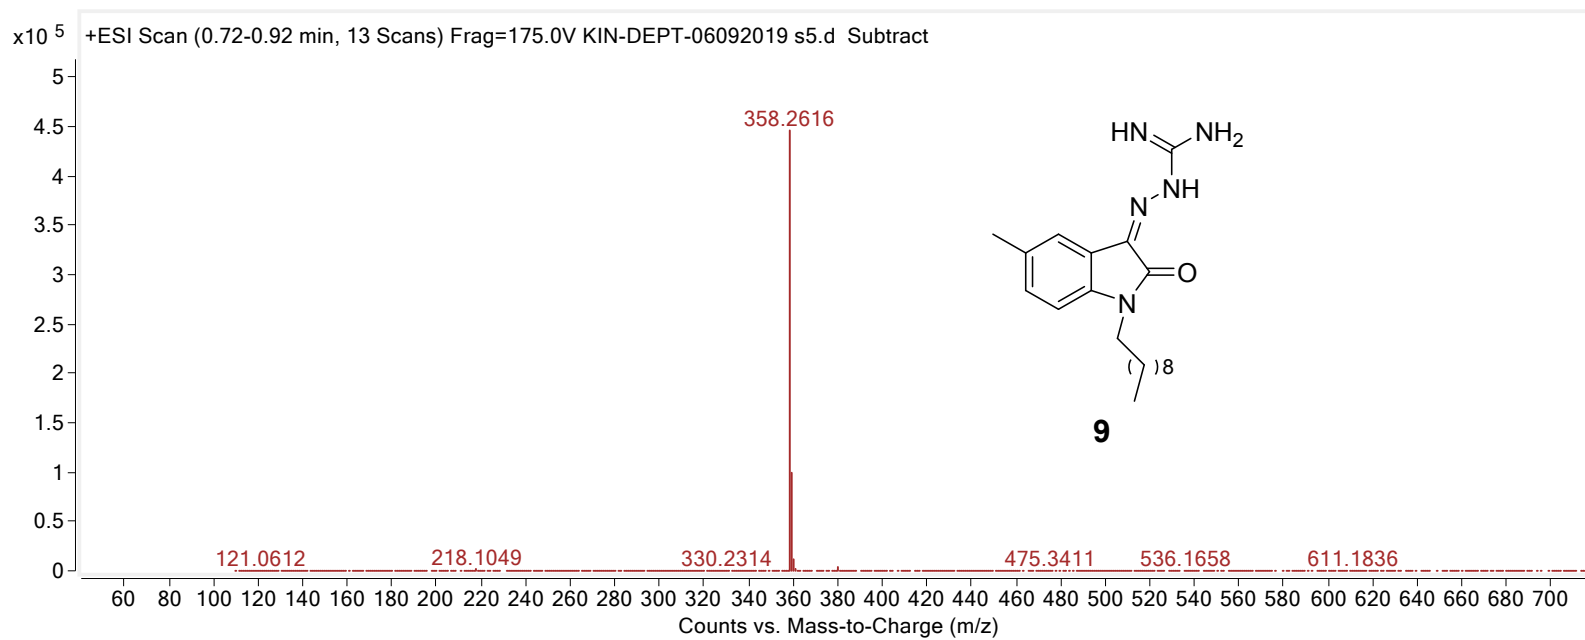

**Figure S29.** HRMS results for compound **9**

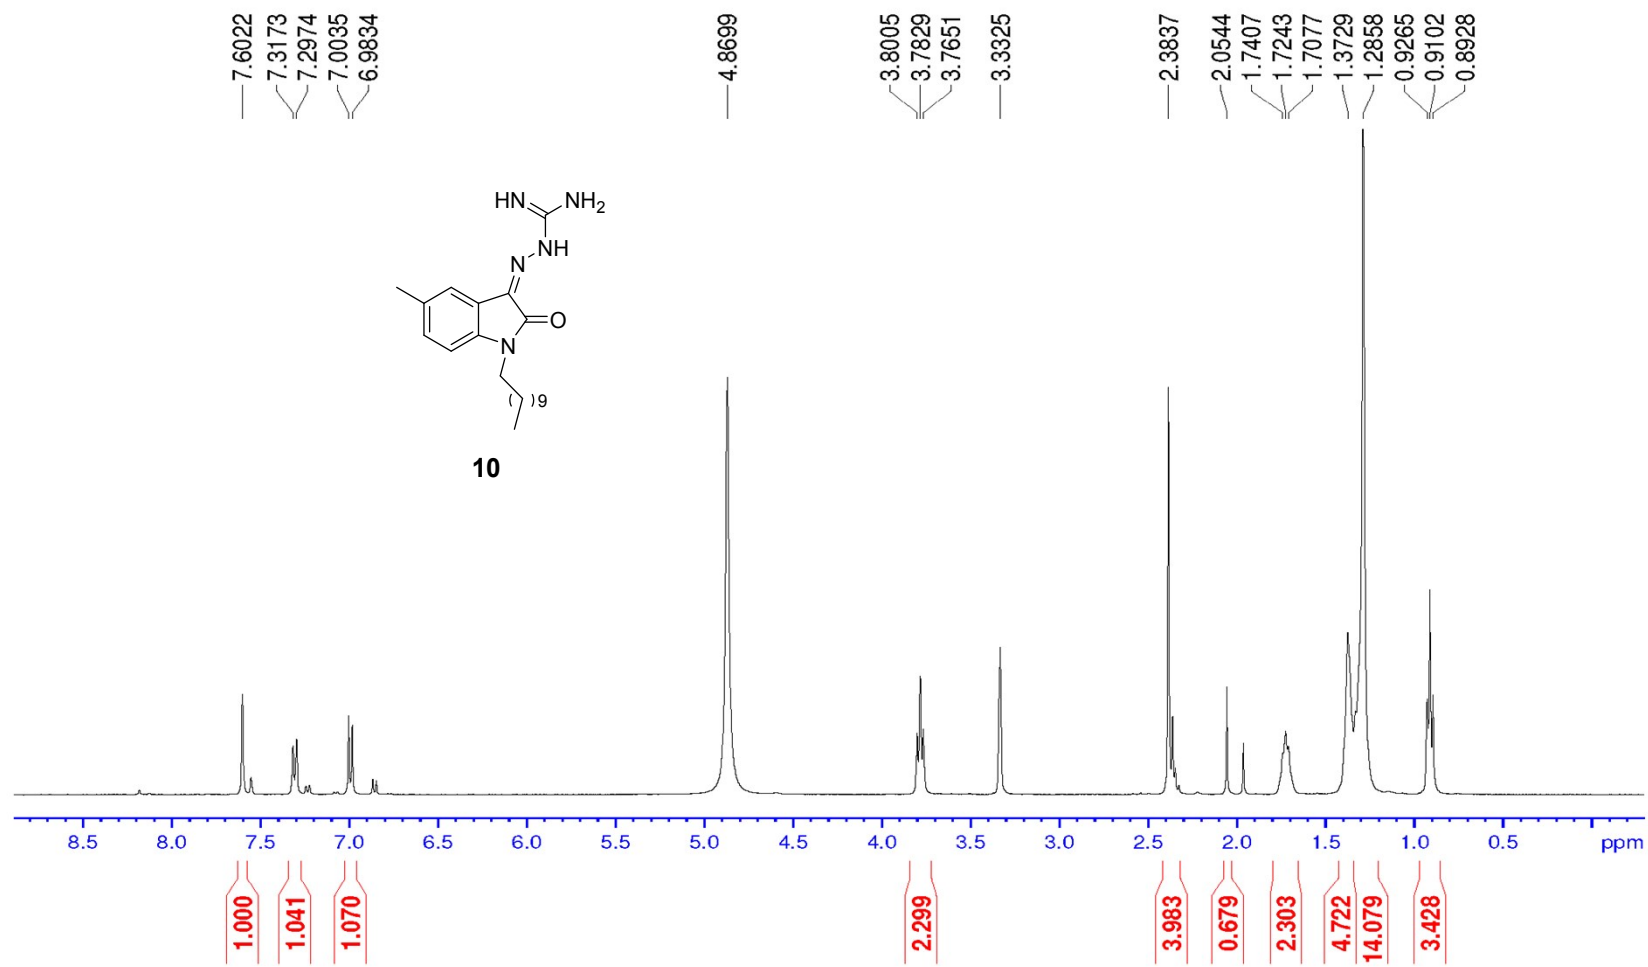

**Figure S30.** <sup>1</sup>H NMR (400 MHz, CD<sub>3</sub>OD) for compound **10**



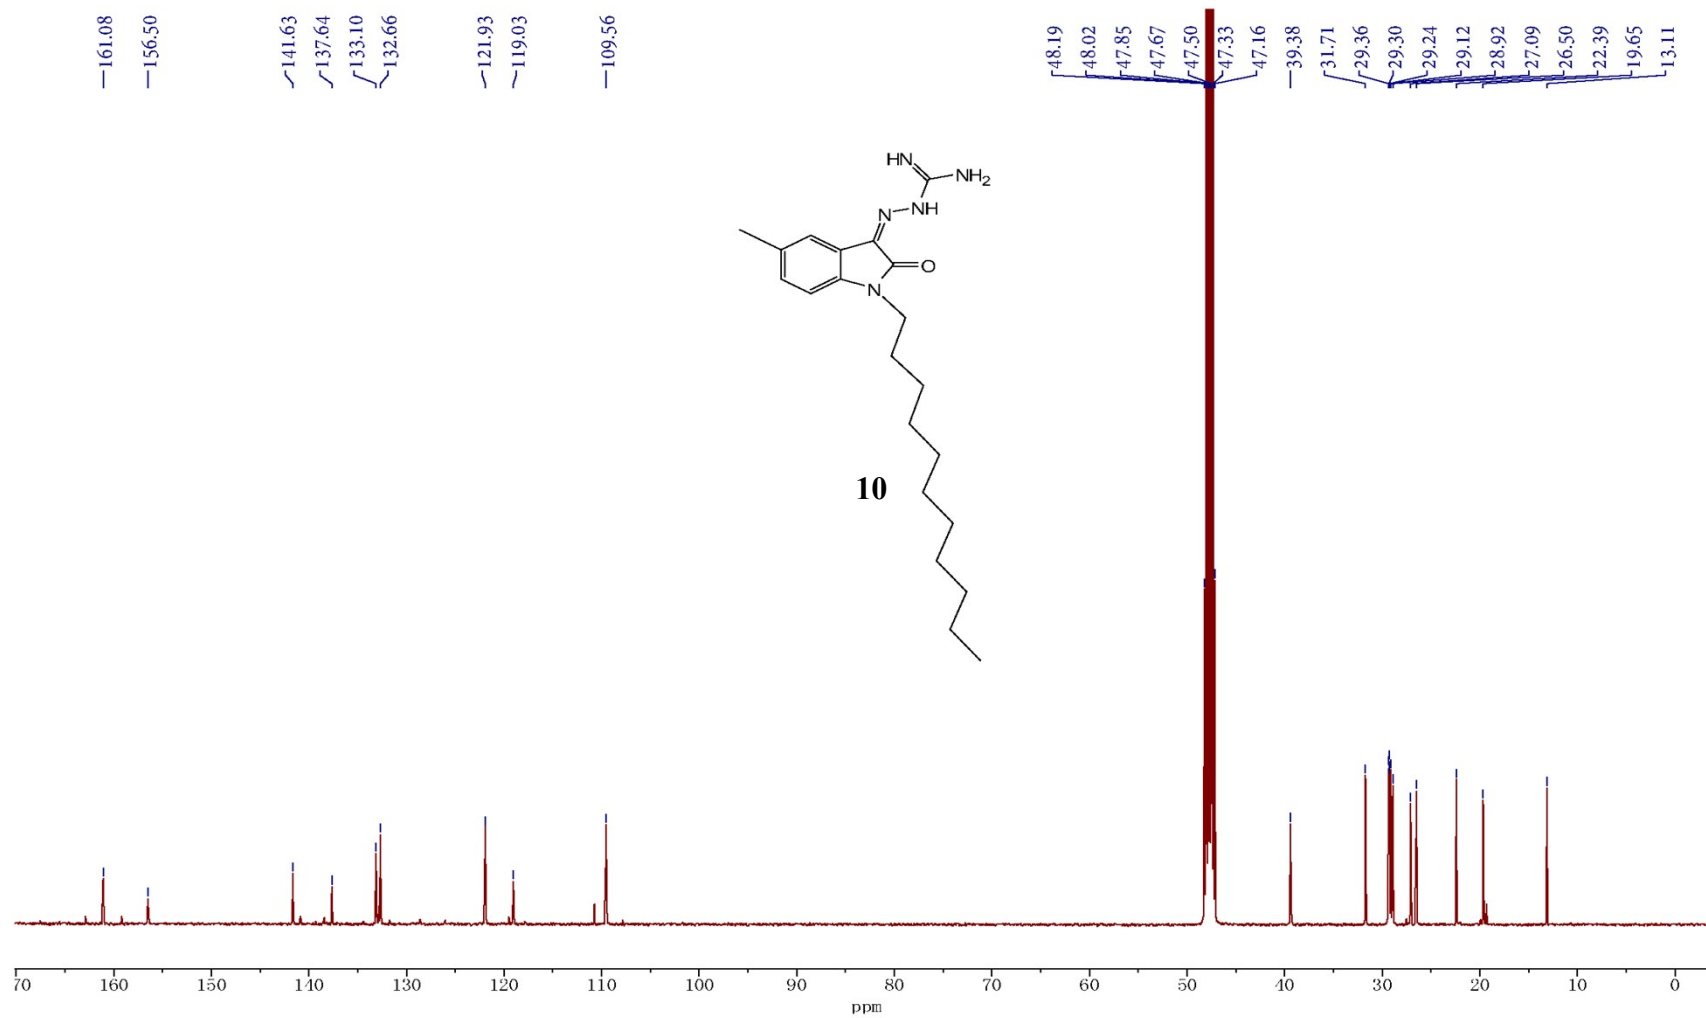

**Figure S31.**  $^{13}\text{C}$  NMR (125 MHz,  $\text{CD}_3\text{OD}$ ) for compound **10**

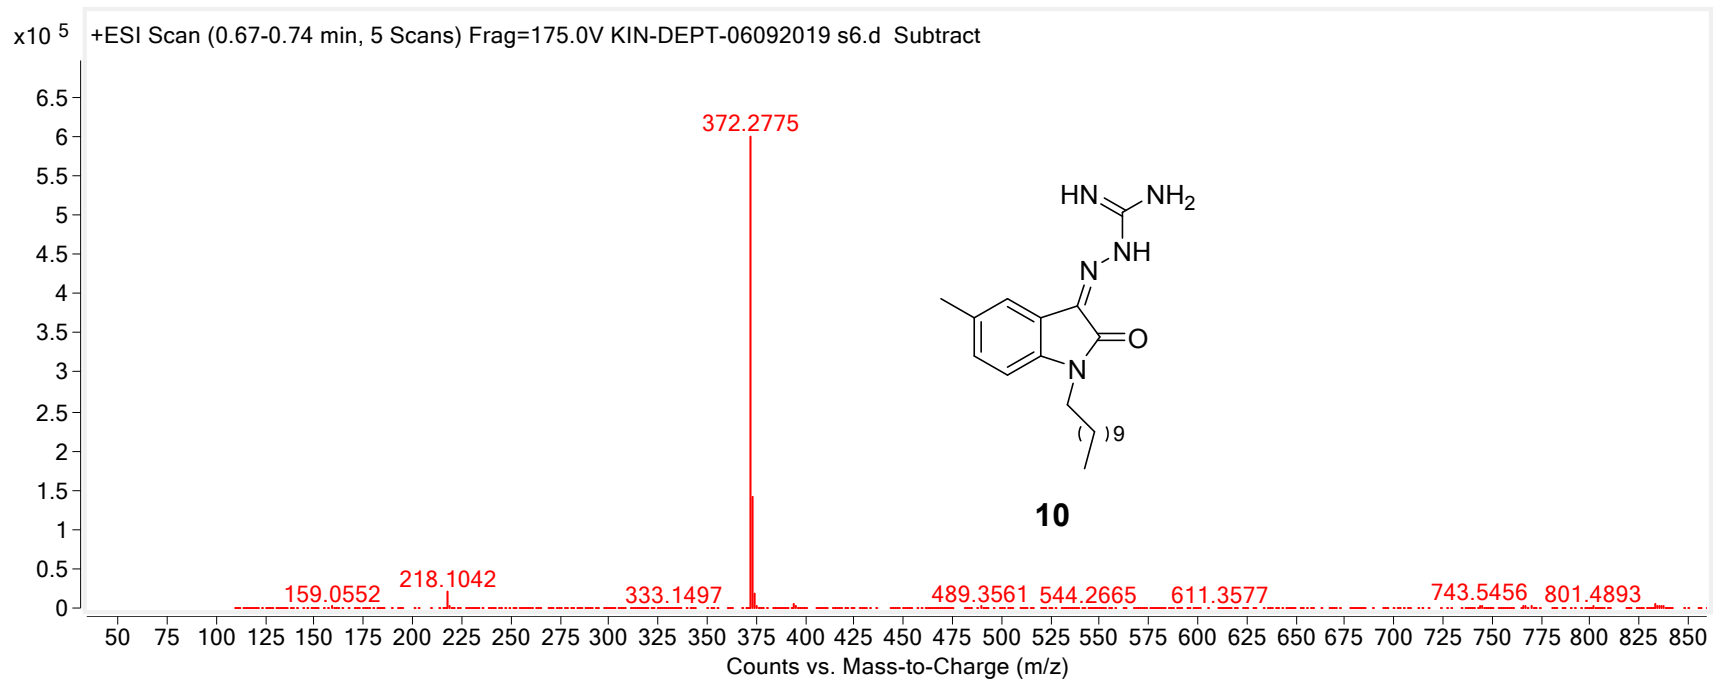

**Figure S32.** HRMS results for compound **10**

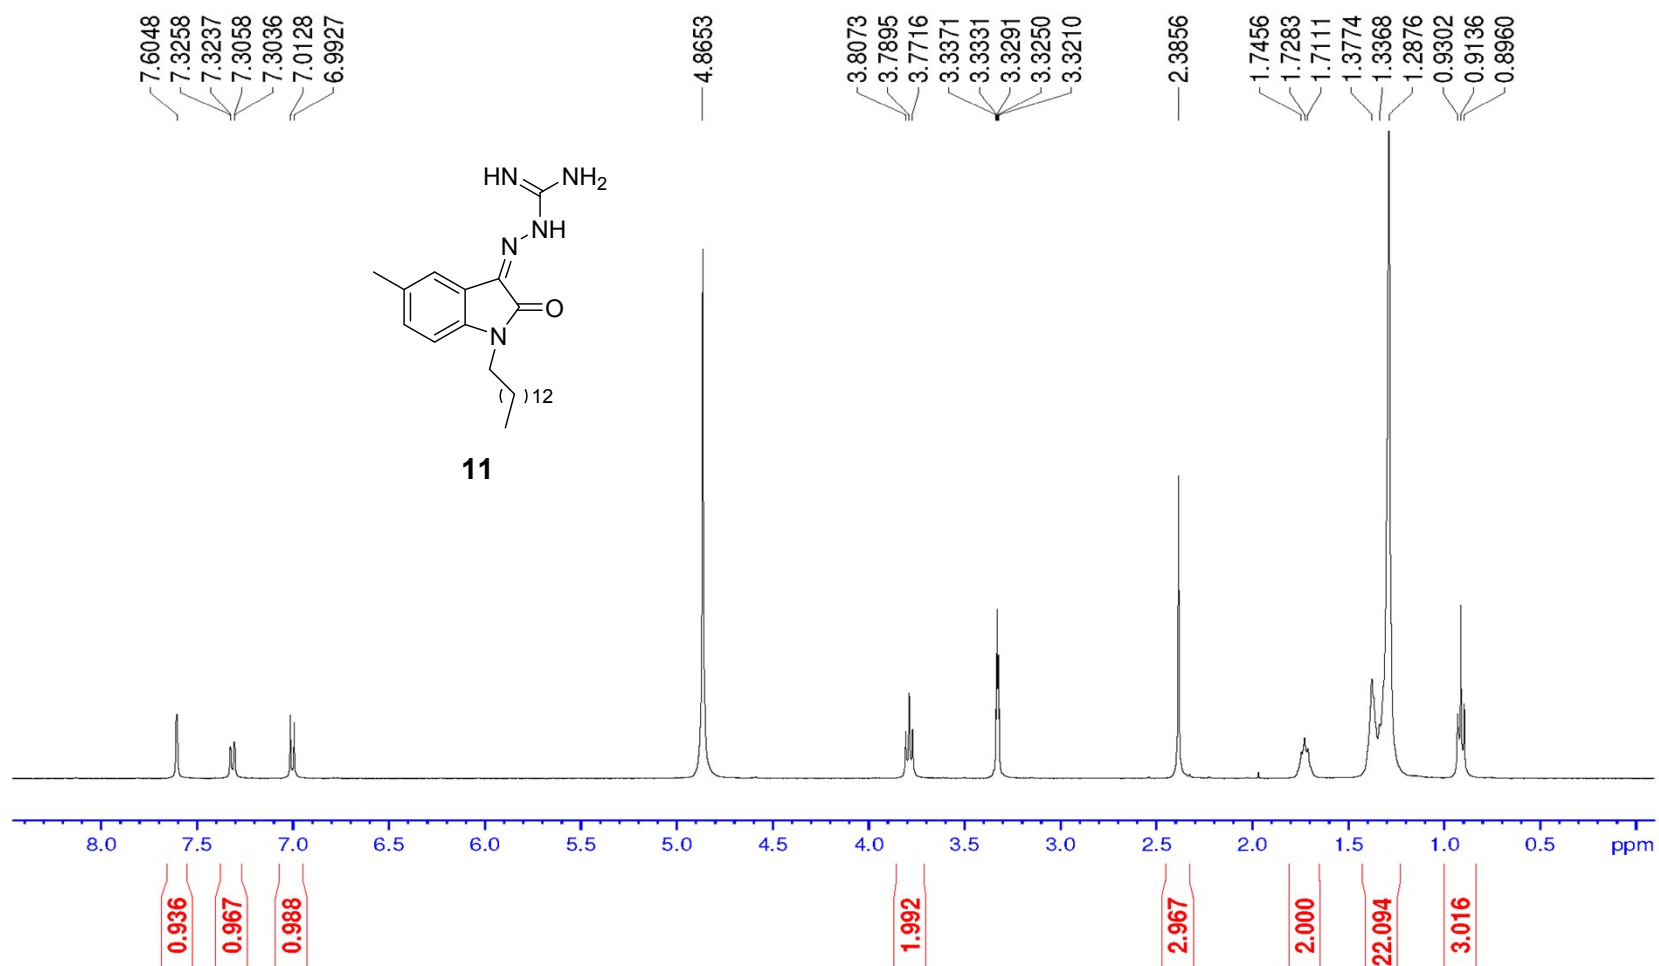

**Figure S33.**  $^1\text{H}$  NMR (400 MHz,  $\text{CD}_3\text{OD}$ ) for compound **11**

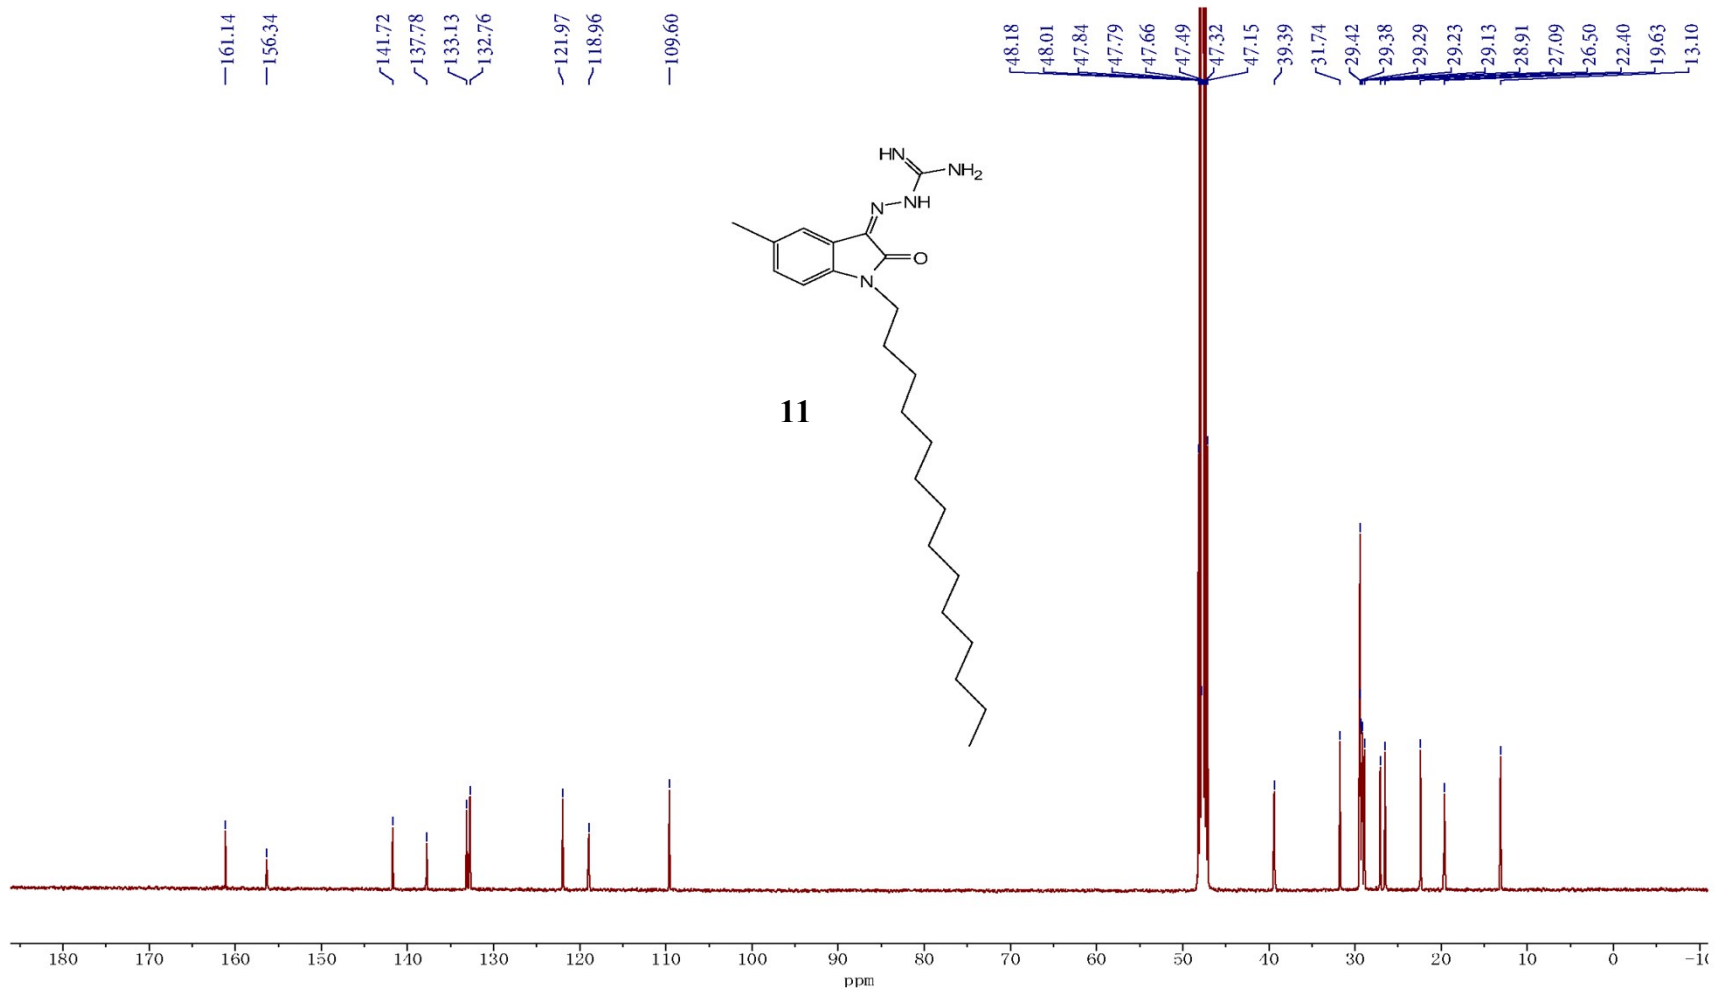

**Figure S34.**  $^{13}\text{C}$  NMR (125 MHz,  $\text{CD}_3\text{OD}$ ) for compound **11**

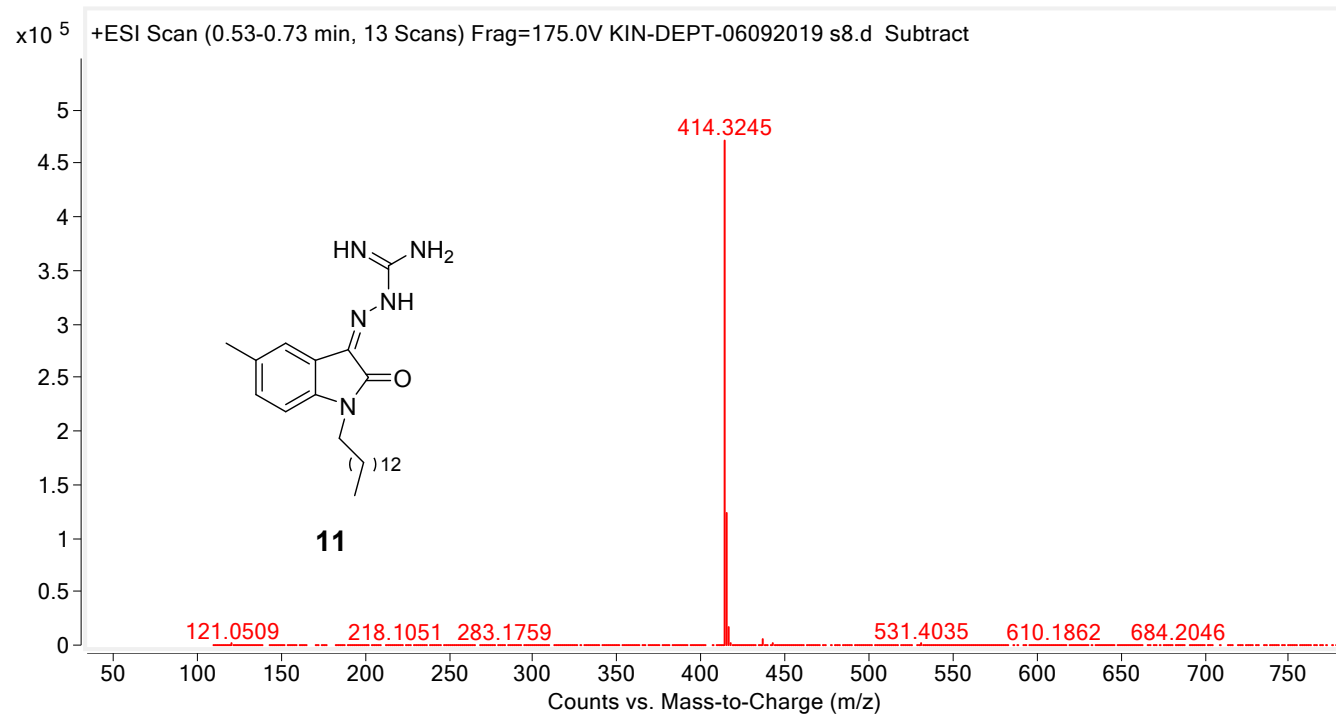

**Figure S35.** HRMS results for compound **11**

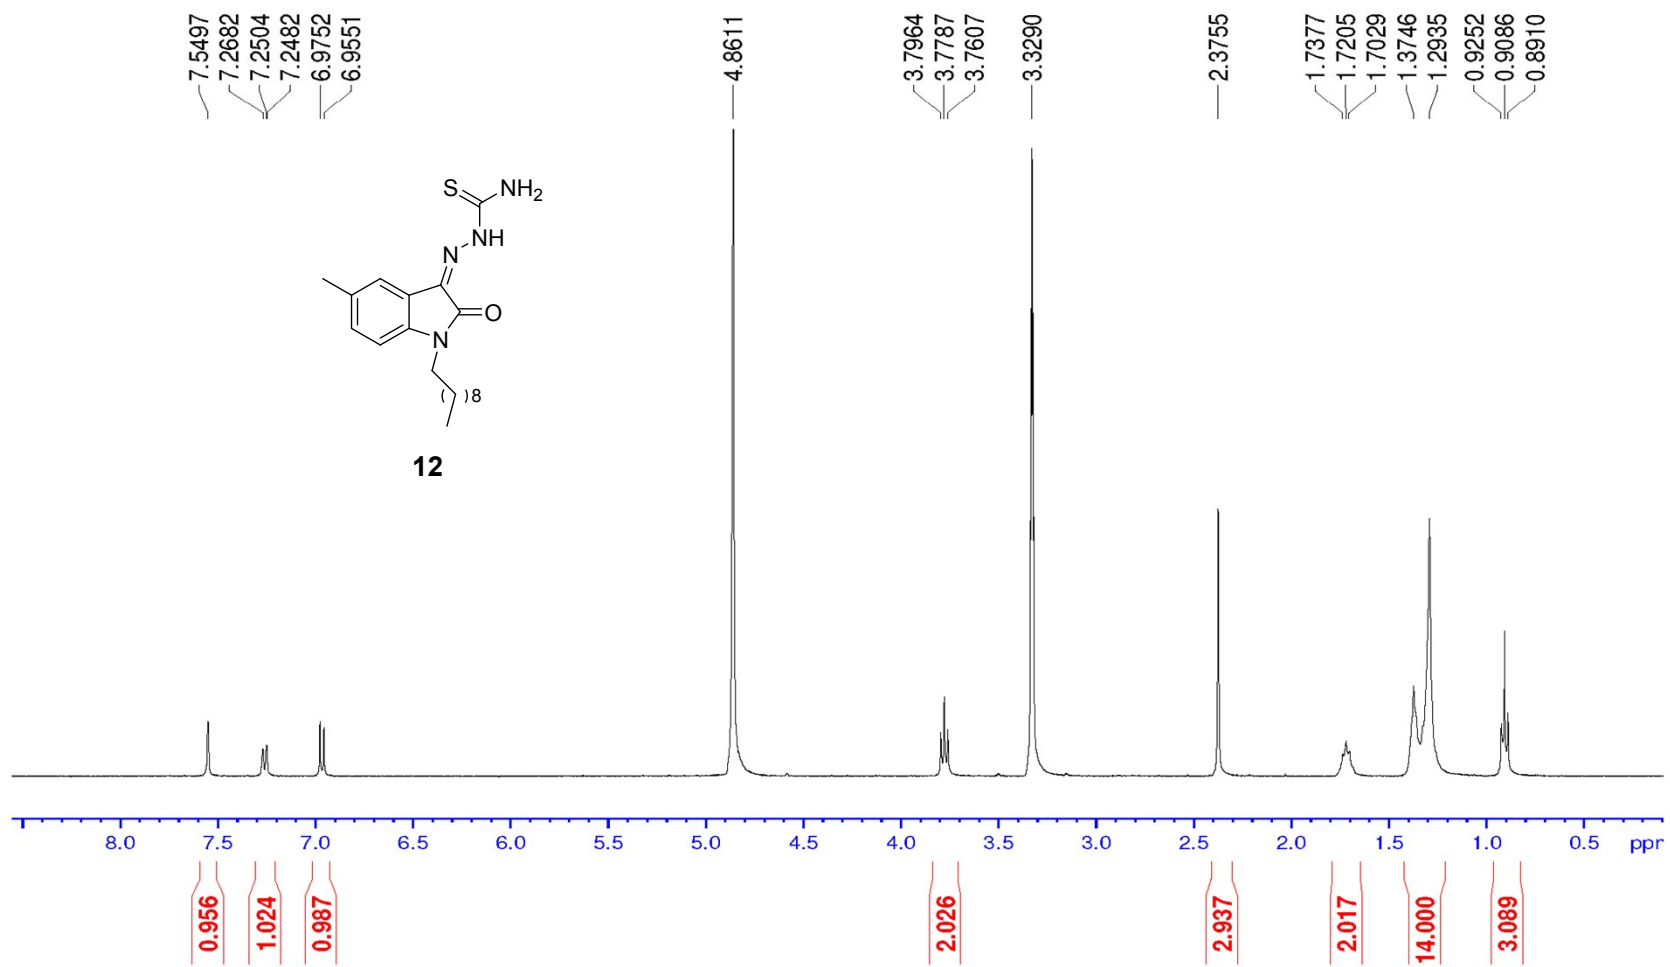

Figure S36. <sup>1</sup>H NMR (400 MHz, CD<sub>3</sub>OD) for compound **12**

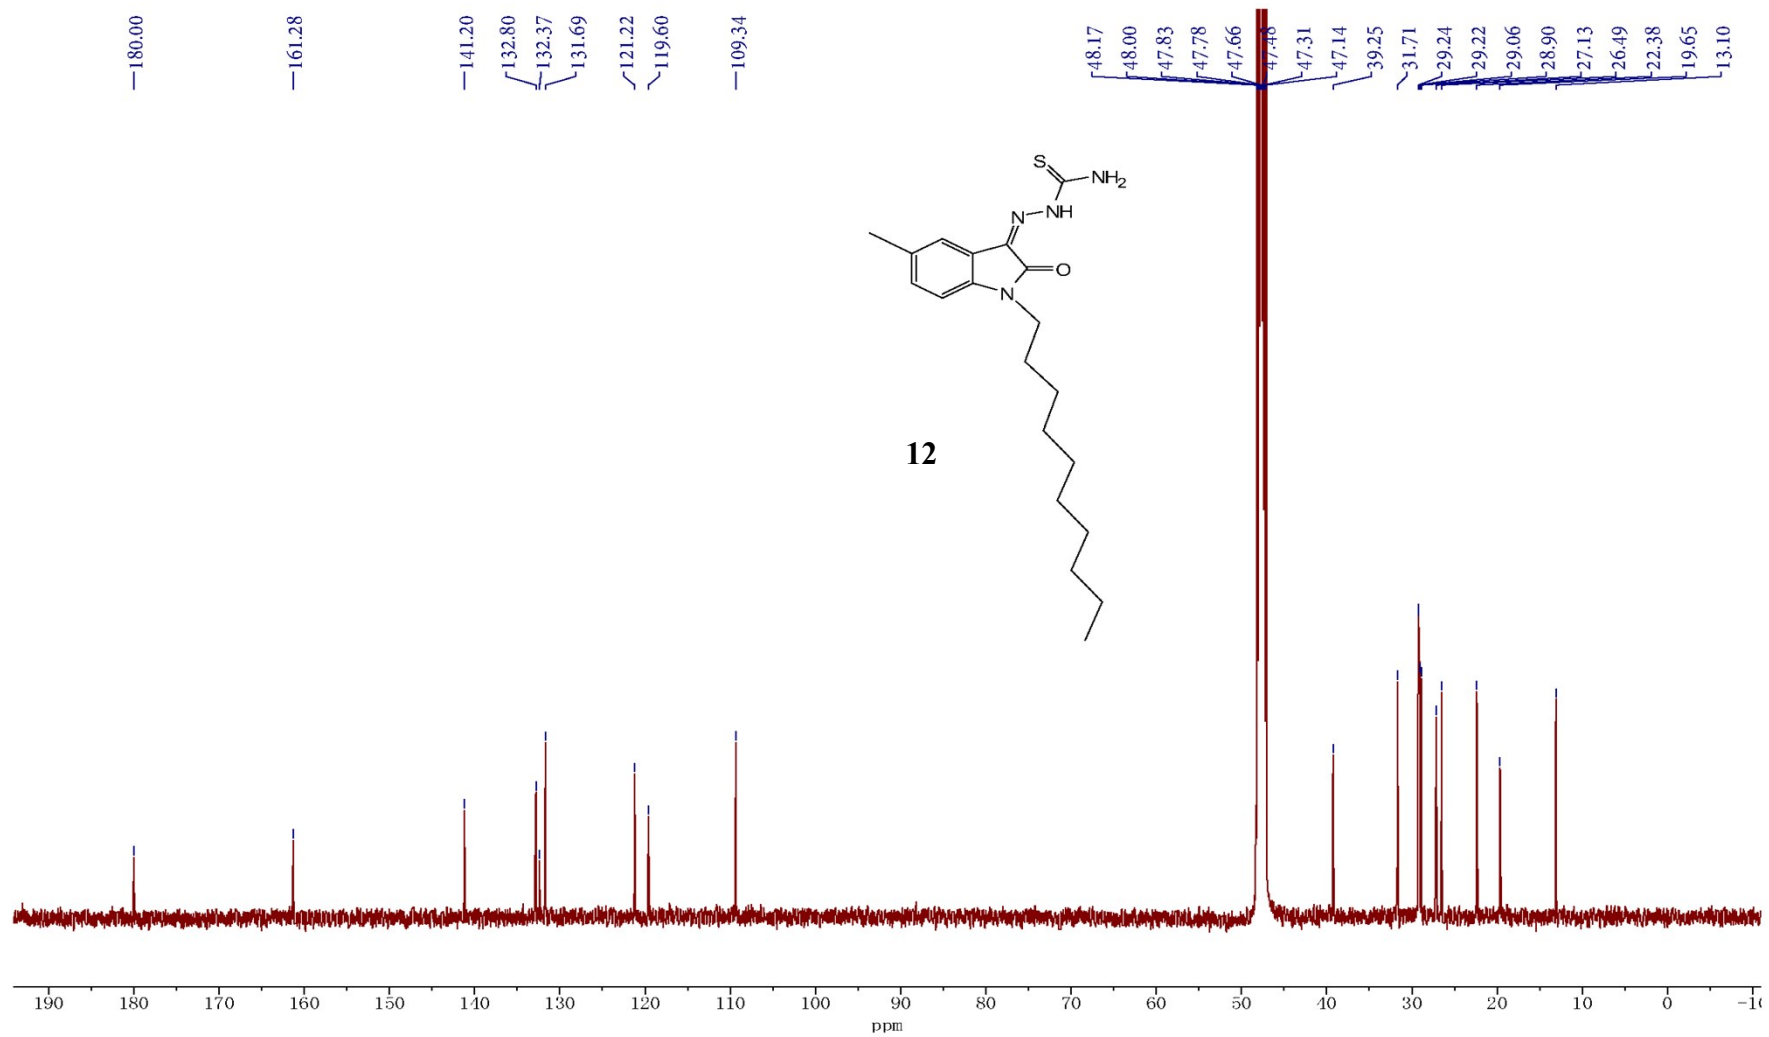

Figure S37. <sup>13</sup>C NMR (125 MHz, CD<sub>3</sub>OD) for compound 12

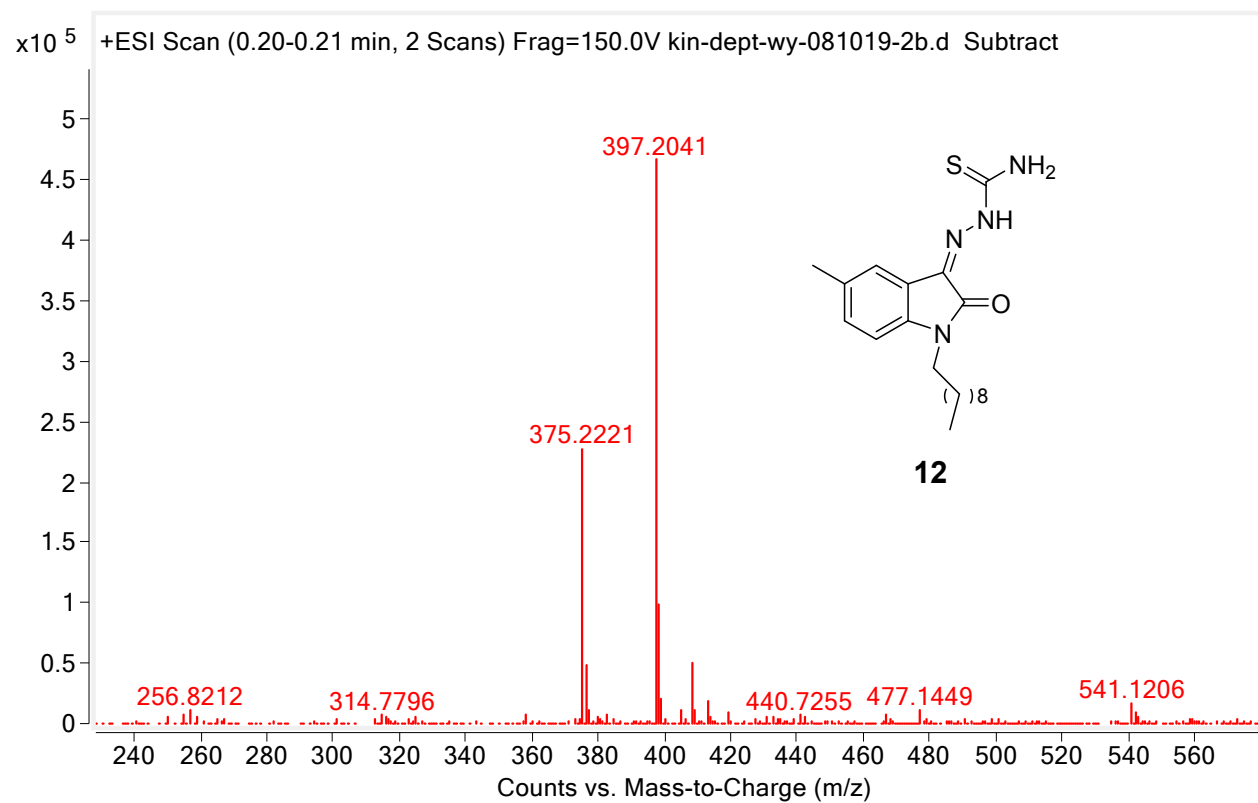

**Figure S38.** HRMS results for compound **12**
